# Supplementary material for: Red circularly polarized luminescence from intramolecular excimers restricted by chiral aromatic foldamers
Source: Royal Society of Chemistry journal article supplement (doi:10.1039/d1cc05163f), 2021-01-01
Supplement: d1cc05163f1.pdf [file d1cc05163f1.pdf]

# Supporting Information

## **Red circularly polarized luminescence from intramolecular excimers restricted by chiral aromatic oligoamide foldamers**

Dan Zheng, Shengzhu Guo, Lu Zheng, Qi Xu, Ying Wang\*, Hua Jiang\*

---

# Table of contents

|                                                                 |    |
|-----------------------------------------------------------------|----|
| General Procedures and Materials.....                           | 3  |
| Synthesis.....                                                  | 3  |
| Synthesis of helicities of <i>S/R</i> -1a~1b.....               | 3  |
| Synthesis of helicities of <i>S/R</i> -PCQ <sub>2</sub> -b..... | 11 |
| Synthesis of helicities of <i>S</i> -2a and <i>S</i> -2b.....   | 14 |
| Chiroptical Properties:.....                                    | 19 |

# General Procedures and Materials.

Anhydrous dichloromethane, tetrahydrofuran and dimethyl formamide were gained from PureSolv MD 5 (Inert solvent purification system). Anhydrous chlorobenzene and triethylamine were distilled over calcium hydride ( $\text{CaH}_2$ ) under Ar atmosphere. *S/R*- $\text{CQ}_n$ -**b** ( $n=0, 1, 2, 3$ ) were prepared according to our previous work.<sup>1</sup> Column chromatography was carried out on flash grade silica gel, using 0 - 20 psig pressure. Analytical TLC was carried out using tapered silica plates with a preadsorbent zone. NMR spectra were obtained with a Bruker spectrometer (400 MHz) and JEOL Delta (400 MHz and 600 MHz) using chloroform- $d$  ( $\text{CDCl}_3$ ) as solvents. The chemical shift references were as follows: ( $^1\text{H}$ ) chloroform- $d$ , 7.26 ppm; ( $^{13}\text{C}$ ) chloroform- $d$ , 77.00 ppm (chloroform- $d$ ), ( $^1\text{H}$ ) dichloromethane- $d_2$ , 5.32 ppm. Mass spectra (ESI, MALDI) were acquired on GCT and FT-ICR spectrometer (Bruker Daltonics Inc. APEXII, BIFLEX III), respectively. CD spectra were recorded on a Chirascan TM Circular Dichroism spectrometer (Applied Photophysics Ltd, Surrey, United Kingdom). CPL spectra were gained with JACSO CPL-300.

## Synthesis

### Synthesis of helicities of *S/R*-**1a~1b**.

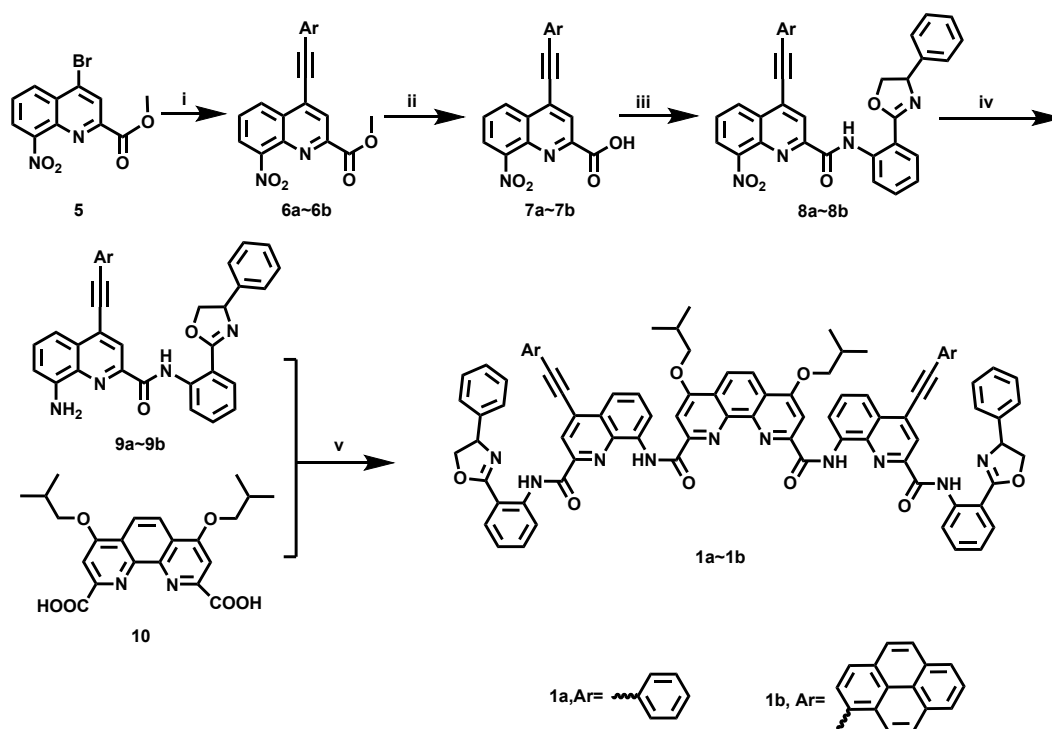

**Scheme S1** Synthesis of compound *S/R*-**1a~1b**. Conditions: i.  $\text{Pd}(\text{PPh}_3)_2\text{Cl}_2$ ,  $\text{CuI}$ , anhydrous THF and anhydrous  $\text{Et}_3\text{N}$ , aromatic acetylene, room temperature; ii. NaOH, THF/MeOH, 40°C; iii. HATU, DIEA, anhydrous DMF, *S*- or *R*- chiral amines; iv. Iron powder,  $\text{CH}_3\text{COOH}$ , MeOH, reflux; v.  $\text{C}_2\text{Cl}_2\text{O}_2$ , dry DCM, room temperature; DIEA, anhydrous DCM, room temperature.

General procedure for compound **6a~6b**: The general Sonogashira coupling procedure described above was used to prepare this compound. 500 mg of 4-bromo-8-nitro-2-quinoline carboxylate (compound **5**) (1.61 mmol, 1.0 equiv.), aromatic acetylene (1.93 mmol, 1.2 eq.), 56 mg of  $\text{Pd}(\text{PPh}_3)_2\text{Cl}_2$  (0.08 mmol, 0.05 eq.), and 0.1 equivalents of  $\text{CuI}$  (31 mg, 0.16 mmol) were combined in a Schlenk flask with 5 mL dry THF and 5 mL dry  $\text{Et}_3\text{N}$ . Once dissolved, the solution

turned into black immediately. Then the solution was stirred at room temperature for overnight. Once done, the solvent was removed at vacuum and the product was soluted in DCM then washed by NH<sub>4</sub>Cl saturated solution and NaCl solution for three times. The organic layer was dried by MgSO<sub>4</sub> and then purified by flash chromatography(SiO<sub>2</sub>, Hexane/DCM stepwise elution, 15:1 to 3:1).

General procedures for **compound 7a~7b**: 1.0 mmol **compound 6a~6b** was dissolved in 5 mL THF and 1 mL MeOH, and 100 mg **sodium hydroxide** (2.5 mmol, 2.5 equiv.) was dissolved in 1 mL water which was then added to above solution dropwise. The solution was then stirred at 40 °C for about 40 min until TLC monitored that compound 6a~6f completely disappeared. After the solution was cooled into room temperature, dilute hydrochloric acid was added to make the solution pH around 1~4. After that, wash the solution with dichloromethane and the organic layer was dried by sodium sulfate powders. Compound 7a~7f was gained after solvent removed.

General procedures for **compound S/R-8a~8b**: 0.5 mmol **compound 7a~7b** and 0.5 mmol **compound chiral amine**, 0.52 mmol (1.2 equiv.) **2-(7-Azabenzotriazol-1-yl)-N,N,N',N'-tetramethyluronium hexafluorophosphate (HATU)** was dissolved in 3 mL anhydrous DMF, and then 1.0 mmol (2.0 equiv.) **N,N-Diisopropylethylamine** was added. The mixture was stirred at room temperature for overnight. Then the solution was dissolved in 20 mL DCM, and was washed by saturated NH<sub>4</sub>Cl solution. After the organic layer was dried and solute was removed, the crude was purified by column chromatography(SiO<sub>2</sub>, Hexane/DCM stepwise elution, 10:1 to 5:1).

General procedures for **compound S/R-9a~9b**: 0.5 mmol **compound S/R-8a~8b** was dissolved in 20 ml methyl alcohol in a 100 mL round flask and 3 ml glacial acetic acid was added. This heterogeneous mixture turned to homogeneous as the temperature increased. After the temperature of solution increased to 75 °C, 2.0 mmol (4.0 equiv.) **Fe powder** was added to the solution with stirring in three portions within 30 minutes, poured over the mixture of ice and water, and then extracted with DCM. The organic phase was washed three times with saturated aqueous NaHCO<sub>3</sub> and brine respectively, dried over sodium sulfate and concentrated in vacuo to give brown red residue which was then purified by column chromatography(SiO<sub>2</sub>, Hexane/DCM stepwise elution, 10:1 to 5:1).

General procedures for **compound S/R-1a~1b**: 0.1 mmol (1.0 equiv.) **compound 10** was suspended in anhydrous CH<sub>2</sub>Cl<sub>2</sub> (2 mL) under argon. 0.5 mmol (5 equiv.) **oxalyl chloride** were added carefully to the mixture because of gas evolution. The reaction slowly turned to a yellow homogeneous solution over 2 h. The solution was concentrated in vacuo to give the acid chloride as a yellow solid, which was pumped dry for 2 h. 0.2 mmol (2.0 equiv.) **compound S/R-9a~9b** and 0.5 mmol (5.0 equiv.) **N, N-diisopropylethylamine** were dissolved in anhydrous CH<sub>2</sub>Cl<sub>2</sub> (3 mL) under argon with stirring. The acid chloride was dissolved in anhydrous CH<sub>2</sub>Cl<sub>2</sub> (5 mL), then were added into amine liquor immediately. After stirring for overnight, TLC analysis indicated completion of the reaction. The mixture extracted with CH<sub>2</sub>Cl<sub>2</sub>. The resultant crude material was purified by column chromatography (SiO<sub>2</sub>, Hexane/DCM stepwise elution, 10:1 to 2:1) to give compounds Cod-68 as a light-yellow solid.

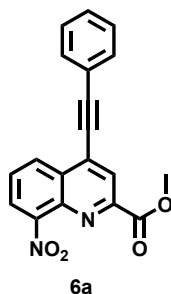

**Compound 6a**: 491 mg compound **6a** was gained as a brown solid, yield 92%. <sup>1</sup>HNMR (400 MHz, CDCl<sub>3</sub>) δ 8.63 (d, *J*=8.4 Hz, 1H), 8.45 (s, 1H), 8.15 (d, *J*=7.6 Hz, 1H), 7.80 (t, *J*=7.6 Hz, 1H), 7.69 (dd, *J*=1.5, 7.3 Hz, 1H), 7.46-7.49 (m, 3H), 3.97 (s, 3H). <sup>13</sup>C NMR (150 MHz, CDCl<sub>3</sub>) δ 165.1, 149.6, 149.0, 139.2, 132.2, 132.03, 130.2, 129.3, 128.8, 127.7,

125.1, 125.1, 121.4, 101.7, 83.9, 77.3, 77.1, 76.9, 53.5, 50.9, 50.8. MS(ESI) calcd C<sub>19</sub>H<sub>12</sub>N<sub>2</sub>O<sub>4</sub>Na for [M+Na]<sup>+</sup>: 355.0689, found 355.0689.

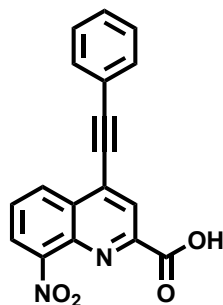

7a

**Compound of 7a:** 400 mg compound **6a** was put into reaction, and 350 mg light-yellow solid was gained as product, yield: 92%. <sup>1</sup>H NMR (400 MHz, CDCl<sub>3</sub>) δ 10.84(br, 1H), 8.73 (dd, *J*=0.8, 7.4 Hz, 1H), 8.56 (s, 1H), 8.30 (dd, *J*=0.8, 7.4 Hz, 1H), 7.89 (t, *J*=8.0 Hz, 1H), 7.0 (dd, *J*=1.3, 7.6 Hz, 2H). <sup>13</sup>C NMR (151 MHz, CDCl<sub>3</sub>) δ 162.9, 147.8, 147.5, 137.6, 134.1, 132.4, 131.0, 130.6, 130.1, 128.9, 128.3, 126.4, 123.3, 121.1, 103.4, 83.7, 77.3, 77.1, 76.9. MS(ESI) calcd C<sub>18</sub>H<sub>10</sub>N<sub>2</sub>O<sub>4</sub> for [M+H]<sup>+</sup>: 319.0713, found 319.0716.

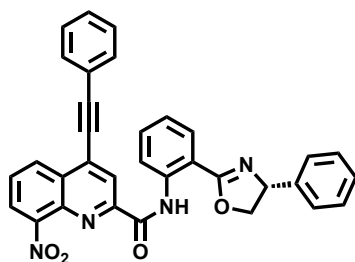

R-8a

**Compound R-8a:** 150 mg compound **6a** was put into reaction, and 230 mg yellow solid was gained as product, yield: 88%. <sup>1</sup>H NMR (400 MHz, CDCl<sub>3</sub>) δ 13.52 (s, 1H), 9.01 (d, *J*=8.4 Hz, 1H), 8.62 (s, 1H), 8.52 (dd, *J*=0.6, 8.4 Hz, 1H), 8.00 (dd, *J*=1.3, 7.8 Hz, 1H), 7.9 (d, *J*=0.9, 8.4 Hz, 1H), 7.61-7.65 (m, 3H), 7.55 (td, *J*=1.2, 8.4 Hz, 1H), 7.37-7.45 (m, 3H), 7.27 (s, 1H), 7.10-7.20 (m, 4H), 5.91 (dd, *J*=6.4, 9.9 Hz, 1H), 4.79 (dd, *J*=9.9, 8.2 Hz, 1H), 4.29 (dd, *J*=6.7, 8.0 Hz, 1H). <sup>13</sup>C NMR (150 MHz, CDCl<sub>3</sub>) δ 164.0, 162.8, 152.6, 148.5, 143.2, 139.3, 138.2, 132.4, 132.2, 132.0, 130.2, 130.0, 129.7, 129.2, 128.8, 128.4, 127.2, 126.9, 126.5, 125.0, 123.8, 123.4, 121.6, 120.8, 115.3, 101.3, 84.2, 77.4, 77.1, 76.9, 74.0, 69.8, 60.5. MS(ESI) calcd C<sub>33</sub>H<sub>23</sub>N<sub>4</sub>O<sub>4</sub> for [M+H]<sup>+</sup>: 537.1568, found 537.1569.

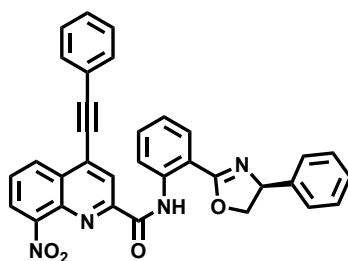

S-8a

**Compound S-8a:** 170 mg compound **7a** was put into reaction, and 250 mg yellow solid was gained as product, yield: 87%. <sup>1</sup>H NMR (400 MHz, CDCl<sub>3</sub>) δ 13.52 (s, 1H), 9.01 (d, *J*=8.4 Hz, 1H), 8.62 (s, 1H), 8.52 (dd, *J*=0.6, 8.4 Hz, 1H), 8.00 (dd, *J*=1.3, 7.8 Hz, 1H), 7.9 (d, *J*=0.9, 8.4 Hz, 1H), 7.61-7.65 (m, 3H), 7.55 (td, *J*=1.2, 8.4 Hz, 1H), 7.37-7.45 (m, 3H),

7.27 (s, 1H), 7.10-7.20 (m, 4H), 5.91 (dd,  $J=6.4, 9.9$  Hz, 1H), 4.79 (dd,  $J=9.9, 8.2$  Hz, 1H), 4.29 (dd,  $J=6.7, 8.0$  Hz, 1H).  $^{13}\text{C}$  NMR (150 MHz,  $\text{CDCl}_3$ )  $\delta$  164.0, 162.9, 152.6, 148.5, 143.1, 139.2, 138.3, 132.5, 132.2, 132.0, 130.2, 130.0, 129.7, 129.3, 128.8, 128.4, 127.2, 126.9, 126.5, 125.0, 123.8, 123.4, 121.6, 120.8, 115.4, 101.3, 84.3, 77.3, 77.1, 76.9, 74.0, 69.7. MS(ESI) calcd  $\text{C}_{33}\text{H}_{23}\text{N}_4\text{O}_4$  for  $[\text{M}+\text{H}]^+$ : 539.1713, found 539.1719.

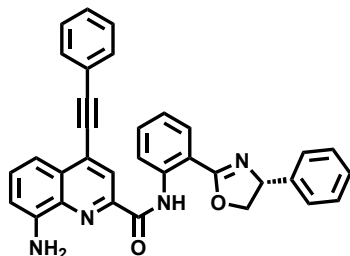

R-9a

**Compound R-9a:** 230 mg compound R-8a was put into reaction, and 140 mg yellow solid was gained as product, yield: 65%.  $^1\text{H}$  NMR (600 MHz,  $\text{CDCl}_3$ )  $\delta$  13.57 (s, 1H), 9.13 (d,  $J=8.0$  Hz, 1H), 8.50 (s, 1H), 8.05 (d,  $J=8.0$  Hz, 1H), 7.65 (d,  $J=6.9$  Hz, 2H), 7.60 (d,  $J=8.6$  Hz, 1H), 7.35-7.42 (m, 9H), 7.260 (dd,  $J=6.9, 8.0$  Hz, 1H), 6.71 (d,  $J=6.9$  Hz, 1H), 5.66 (dd,  $J=8.0$  Hz, 1H), 4.76 (dd,  $J=8.0$  Hz, 1H), 4.56 (s, 2H), 4.19 (t,  $J=8.0$  Hz, 1H).  $^{13}\text{C}$  NMR (100 MHz,  $\text{CDCl}_3$ )  $\delta$  165.2, 163.7, 146.6, 145.4, 142.4, 139.7, 136.2, 133.0, 132.3, 130.2, 130.2, 129.3, 129.1, 128.1, 126.6, 125.6, 123.0, 122.6, 120.8, 114.4, 113.1, 110.3, 96.9, 87.8, 77.4, 77.1, 76.8, 73.7, 70.8, 32.0, 29.8, 22.8, 14.2. MS(ESI) calcd  $\text{C}_{33}\text{H}_{24}\text{N}_4\text{O}_2$  for  $[\text{M}+\text{H}]^+$ : 509.1978, found 509.1974.

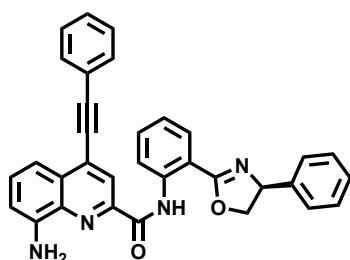

S-9a

**Compound S-9a:** 250 mg compound S-8a was put into reaction, and 160 mg yellow solid was gained as product, yield: 67%.  $^1\text{H}$  NMR (600 MHz,  $\text{CDCl}_3$ )  $\delta$  13.57 (s, 1H), 9.13 (d,  $J=8.0$  Hz, 1H), 8.50 (s, 1H), 8.05 (d,  $J=8.0$  Hz, 1H), 7.65 (d,  $J=6.9$  Hz, 2H), 7.60 (d,  $J=8.6$  Hz, 1H), 7.35-7.42 (m, 9H), 7.260 (dd,  $J=6.9, 8.0$  Hz, 1H), 6.71 (d,  $J=6.9$  Hz, 1H), 5.66 (dd,  $J=8.0$  Hz, 1H), 4.76 (dd,  $J=8.0$  Hz, 1H), 4.56 (s, 2H), 4.19 (t,  $J=8.0$  Hz, 1H).  $^{13}\text{C}$  NMR (100 MHz,  $\text{CDCl}_3$ )  $\delta$  164.6, 163.8, 163.7, 144.5, 144.2, 142.4, 139.4, 136.3, 132.8, 132.7, 132.1, 131.1, 130.1, 130.1, 129.8, 129.5, 129.4, 129.1, 128.9, 128.6, 128.5, 127.8, 127.4, 126.6, 126.0, 125.8, 123.2, 123.1, 122.7, 122.6, 121.2, 120.8, 114.6, 113.8, 113.4, 108.0, 107.8, 99.2, 77.4, 77.3, 77.1, 76.8, 75.8, 73.8, 73.2, 69.8, 69.6, 54.1. MS(ESI) calcd  $\text{C}_{33}\text{H}_{23}\text{N}_4\text{O}_2$  for  $[\text{M}+\text{H}]^+$ : 507.1827, found 507.1826.

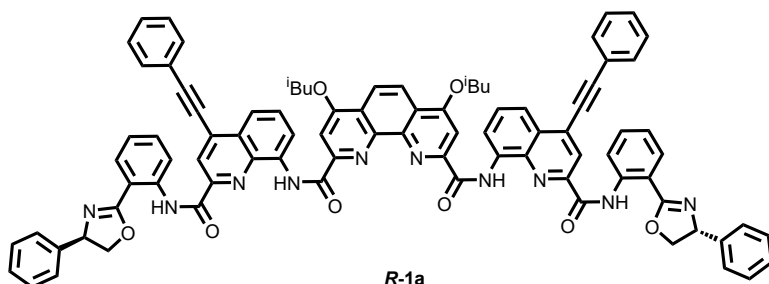

R-1a

**Compound R-1a:** 50 mg compound **S-9a** was put into reaction, and 105 mg yellow solid was gained as product, yield: 61%. <sup>1</sup>H NMR (600 MHz, CDCl<sub>3</sub>) δ 13.01(s, 1H), 12.90 (s, 1H), 8.89 (d, *J*=6.9 Hz, 1H), 8.86 (d, *J*=8.0 Hz, 1H), 8.28 (s, 1H), 7.96 (d, *J*=8.0 Hz, 1H), 7.79 (dd, *J*=6.9, 8.0 Hz, 1H), 7.60 (d, *J*=6.9, 8.0 Hz, 1H), 7.56 (s, 1H), 7.44 (d, *J*=6.9 Hz, 2H), 7.36 (s, 1H), 7.329 (dd, *J*=6.9, 8.0 Hz, 1H), 7.19 (d, *J*=6.9 Hz, 1H), 7.18 (d, *J*=8.0 Hz, 1H), 7.06 (d, *J*=8.0 Hz, 1H), 6.91, 6.90, 6.89 (d, *J*=6.9, 8.0 Hz, 1H), 6.82 (d, *J*=6.9 Hz, 1H), 6.80 (d, *J*=6.9 Hz, 1H), 6.79 (d, *J*=8.0 Hz, 1H), 6.51(d, *J*=8.0 Hz, 2H), 4.11 (dd, *J*=6.9, 8.0 Hz, 1H), 4.01 (dd, *J*=6.9, 8.0 Hz, 1H), 3.44 (t, *J*=8.0 Hz, 1H), 3.31 (dd, *J*=6.9, 8.0 Hz, 1H), 2.88 (dd, *J*=6.9, 8.0 Hz, 1H), 2.36 (m, 1H), 1.25 (dd, *J*=6.9, 5.8 Hz, 6H). <sup>13</sup>C NMR (150 MHz, CDCl<sub>3</sub>) δ 162.9, 162.3, 162.1, 161.7, 150.9, 147.3, 144.5, 141.3, 139.0, 137.1, 134.8, 132.3, 132.1, 130.4, 129.5, 129.1, 128.4, 128.2, 127.7, 127.2, 126.0, 122.3, 122.0, 121.8, 121.3, 120.4, 119.8, 118.4, 114.1, 100.6, 99.2, 85.2, 77.3, 77.1, 76.9, 75.6, 72.2, 69.3, 29.8, 28.3, 19.4, 19.3, 14.3. MS(ESI) calcd C<sub>88</sub>H<sub>69</sub>N<sub>10</sub>O<sub>8</sub>F<sub>6</sub> for [M+H]<sup>+</sup>: 1393.5294, found 1393.5289.

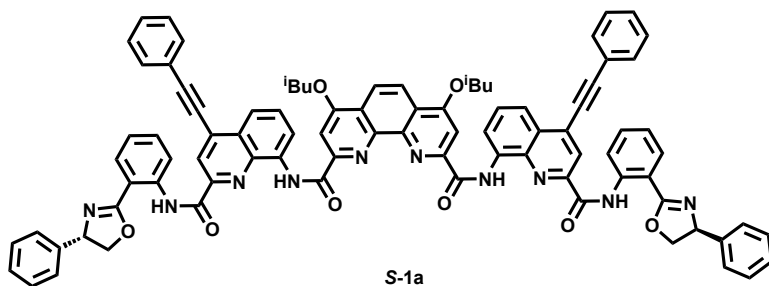

**Compound S-1a:** 50 mg compound **S-9a** was put into reaction, and 115 mg yellow solid was gained as product, yield: 69%. <sup>1</sup>H NMR (600 MHz, CDCl<sub>3</sub>) δ 13.01(s, 1H), 12.90 (s, 1H), 8.89 (d, *J*=6.9 Hz, 1H), 8.86 (d, *J*=8.0 Hz, 1H), 8.28 (s, 1H), 7.96 (d, *J*=8.0 Hz, 1H), 7.79 (dd, *J*=6.9, 8.0 Hz, 1H), 7.60 (d, *J*=6.9, 8.0 Hz, 1H), 7.56 (s, 1H), 7.44 (d, *J*=6.9 Hz, 2H), 7.36 (s, 1H), 7.329 (dd, *J*=6.9, 8.0 Hz, 1H), 7.19 (d, *J*=6.9 Hz, 1H), 7.18 (d, *J*=8.0 Hz, 1H), 7.06 (d, *J*=8.0 Hz, 1H), 6.91, 6.90, 6.89 (d, *J*=6.9, 8.0 Hz, 1H), 6.82 (d, *J*=6.9 Hz, 1H), 6.80 (d, *J*=6.9 Hz, 1H), 6.79 (d, *J*=8.0 Hz, 1H), 6.51(d, *J*=8.0 Hz, 2H), 4.11 (dd, *J*=6.9, 8.0 Hz, 1H), 4.01 (dd, *J*=6.9, 8.0 Hz, 1H), 3.44 (t, *J*=8.0 Hz, 1H), 3.31 (dd, *J*=6.9, 8.0 Hz, 1H), 2.88 (dd, *J*=6.9, 8.0 Hz, 1H). <sup>13</sup>C NMR (150 MHz, CDCl<sub>3</sub>) δ 162.9, 162.2, 162.1, 161.7, 150.9, 147.3, 144.5, 141.3, 139.0, 137.1, 134.8, 132.2, 132.1, 131.0, 130.4, 129.5, 129.1, 128.9, 128.4, 128.3, 128.2, 127.7, 127.1, 126.0, 122.3, 122.0, 121.8, 121.3, 120.4, 119.8, 118.4, 114.1, 100.6, 99.2, 85.2, 77.3, 77.1, 76.9, 75.6, 72.2, 69.3, 65.6, 30.7, 28.3, 19.4, 19.3, 19.3, 13.8. MS(ESI) calcd C<sub>88</sub>H<sub>69</sub>N<sub>10</sub>O<sub>8</sub>F<sub>6</sub> for [M+H]<sup>+</sup>: 1393.5294, found 1393.5282.

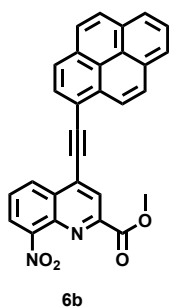

**Compound 6b:** 350 mg compound **5** was put into reaction, and 276 mg orange solid was gained as product, yield: 81%. <sup>1</sup>H NMR (400 MHz, CDCl<sub>3</sub>) δ 8.85 (d, *J*=8.5 Hz, 1H), 8.71 (d, *J*=9.1 Hz, 1H), 8.64 (s, 1H), 8.36 (d, *J*=8.4 Hz, 1H), 8.29 (d, *J*=7.6 Hz, 1H), 8.19-8.24 (m, 3H), 8.10-8.12 (m, 2H), 7.88 (t, *J*=6.9 Hz, 1H), 4.11 (s, 3H). <sup>13</sup>C NMR (100 MHz, CDCl<sub>3</sub>) δ 165.2, 149.6, 149.0, 139.2, 132.7, 132.1, 131.2, 130.9, 130.3, 130.2, 129.5, 129.4, 129.2, 127.7, 127.2, 126.7, 126.4, 125.1, 125.0, 125.0, 124.7, 124.5, 115.4, 101.2, 89.5, 77.4, 77.1, 76.8, 53.5. MS(ESI) calcd C<sub>28</sub>H<sub>13</sub>N<sub>2</sub>O<sub>4</sub> for [M-CH<sub>3</sub>]<sup>-</sup>: 441.0880, found 441.0883.

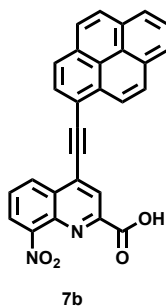

**Compound 7b:** 270 mg compound **6b** was put into reaction, and 230 mg black solid was gained as product, yield: 88%. <sup>1</sup>H NMR (600 MHz, DMSO-*d*<sub>6</sub>) δ 13.97 (s, 1H), 8.91 (dd, *J* = 8.5, 1.3 Hz, 1H), 8.81 (d, *J* = 9.0 Hz, 1H), 8.66 (s, 1H), 8.63 (d, *J* = 8.0 Hz, 1H), 8.52 – 8.49 (m, 2H), 8.48 (d, *J* = 7.4 Hz, 1H), 8.45 (d, *J* = 7.9 Hz, 2H), 8.37 (d, *J* = 8.9 Hz, 1H), 8.31 (d, *J* = 8.9 Hz, 1H), 8.20 (t, *J* = 7.6 Hz, 1H), 8.13 – 8.07 (m, 1H). MS(ESI) calcd C<sub>28</sub>H<sub>15</sub>N<sub>2</sub>O<sub>4</sub> for [M+H]<sup>+</sup>: 443.1026, found 443.1021.

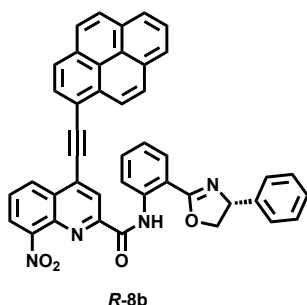

**Compound R-8b:** 100 mg compound **7b** was put into reaction, and 120 mg orange solid was gained as product, yield: 79%. <sup>1</sup>H NMR (600 MHz, CDCl<sub>3</sub>) δ 13.53 (s, 1H), 9.07 (d, *J* = 8.0 Hz, 1H), 8.65 (s, 1H), 8.60 (d, *J* = 8.0 Hz, 1H), 8.57 (d, *J* = 8.0 Hz, 1H), 8.23-8.27 (m, 3H), 8.13 (t, *J* = 9.2 Hz, 2H), 7.97-8.05 (m, 6H), 7.65 (t, *J* = 8.0 Hz, 2H), 7.59 (t, *J* = 8.0 Hz, 2H), 7.32 (d, *J* = 8.0 Hz, 2H), 7.20-7.25 (m, 3H), 7.16 (d, *J* = 6.9 Hz, 2H), 5.96 (t, *J* = 6.9 Hz, 1H), 4.84 (t, *J* = 8.0 Hz, 2H), 4.33 (t, *J* = 8.0 Hz, 2H). <sup>13</sup>C NMR (100 MHz, CDCl<sub>3</sub>) δ 164.0, 162.8, 152.1, 148.2, 143.3, 139.3, 137.9, 132.4, 131.6, 130.9, 130.7, 130.3, 129.9, 129.8, 129.2, 129.1, 128.6, 127.4, 127.0, 126.7, 126.5, 126.3, 126.2, 125.0, 124.7, 124.6, 124.2, 123.8, 123.3, 120.7, 115.6, 115.2, 100.6, 89.7, 77.4, 77.1, 76.8, 74.1, 69.9, 36.5, 31.5. MS(ESI) calcd C<sub>43</sub>H<sub>26</sub>N<sub>4</sub>O<sub>4</sub> for [M+H]<sup>+</sup>: 663.2027, found 663.2027.

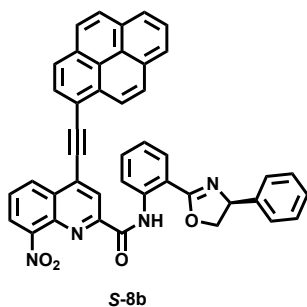

**Compound S-8b:** 100 mg compound **7b** was put into reaction, and 114 mg orange solid was gained as product, yield: 75%. <sup>1</sup>H NMR (600 MHz, CDCl<sub>3</sub>) δ 13.53 (s, 1H), 9.07 (d, *J* = 8.0 Hz, 1H), 8.65 (s, 1H), 8.60 (d, *J* = 8.0 Hz, 1H), 8.57 (d, *J* = 8.0 Hz, 1H), 8.23-8.27 (m, 3H), 8.13 (t, *J* = 9.2 Hz, 2H), 7.97-8.05 (m, 6H), 7.65 (t, *J* = 8.0 Hz, 2H), 7.59 (t, *J* = 8.0 Hz, 2H), 7.32 (d, *J* = 8.0 Hz, 2H), 7.20-7.25 (m, 3H), 7.16 (d, *J* = 6.9 Hz, 2H), 5.96 (t, *J* = 6.9 Hz, 1H), 4.84 (t, *J* = 8.0 Hz, 2H), 4.33 (t, *J* = 8.0 Hz, 2H). <sup>13</sup>C NMR (150 MHz, CDCl<sub>3</sub>) δ 164.0, 162.9, 152.4, 148.4, 143.2, 139.3, 138.2, 132.6, 132.6, 132.5, 132.0, 131.1, 130.9, 130.3, 130.1, 129.8, 129.4, 129.3, 129.0, 128.5, 127.3, 127.1, 126.8, 126.6, 126.3, 125.1.



124.9, 124.7, 124.4, 124.1, 123.6, 123.4, 120.8, 115.6, 115.4, 100.8, 89.8, 77.3, 77.1, 76.9, 74.1, 69.8. MS(ESI) calcd  $C_{43}H_{26}N_4O_4$  for  $[M+H]^+$ : 663.2027, found 663.2029.

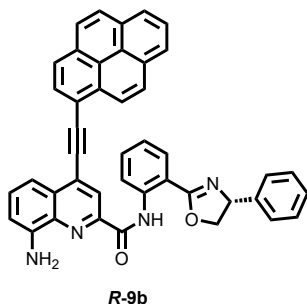

**Compound R-9b:** 100 mg compound **R-8b** was put into reaction, and 65 mg orange solid was gained as product, yield: 68%.  $^1H$  NMR (400 MHz,  $CDCl_3$ )  $\delta$  13.59 (s, 1H), 9.17 (d,  $J=7.6$  HZ, 1H), 8.75 (d,  $J=8.4$  HZ, 1H), 8.66 (s, 1H), 8.31 (d,  $J=7.6$  HZ, 1H), 8.22-8.27 (m, 3H), 8.17 (d,  $J=7.6$  HZ, 1H), 8.13 (d,  $J=9.2$  HZ, 1H), 8.03-8.08 (m, 3H), 7.81 (d,  $J=7.6$  HZ, 1H), 7.64 (t,  $J=7.6$  HZ, 1H), 7.34-7.48 (m, 6H), 7.22 (t,  $J=7.6$  HZ, 1H), 6.75 (d,  $J=6.1$  HZ, 1H), 5.68 (d,  $J=8.4$  HZ, 1H), 4.78 (d,  $J=8.4$  HZ, 1H), 4.20 (t,  $J=7.6$  HZ, 1H).  $^{13}C$  NMR (150 MHz,  $CDCl_3$ )  $\delta$  165.2, 163.9, 146.6, 145.4, 142.5, 139.8, 136.4, 133.0, 132.4, 132.1, 131.3, 131.1, 130.2, 130.1, 130.1, 129.5, 129.1, 129.0, 128.8, 128.1, 127.3, 126.6, 126.5, 126.1, 126.0, 125.4, 124.7, 124.6, 124.3, 122.9, 122.4, 120.7, 116.7, 114.4, 113.5, 110.3, 98.4, 91.5, 77.3, 77.1, 76.9, 73.8, 70.8. MS(ESI) calcd  $C_{33}H_{29}N_4O_2$  for  $[M+H]^+$ : 633.2278, found 633.2285.

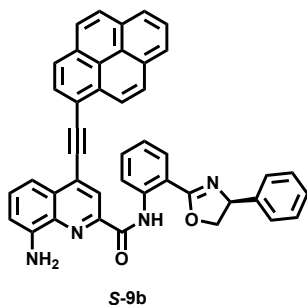

**Compound S-9b:** 120 mg compound **S-8b** was put into reaction, and 89 mg orange solid was gained as product, yield: 78%.  $^1H$  NMR (400 MHz,  $CDCl_3$ )  $\delta$  13.59 (s, 1H), 9.17 (d,  $J=7.6$  HZ, 1H), 8.75 (d,  $J=8.4$  HZ, 1H), 8.66 (s, 1H), 8.31 (d,  $J=7.6$  HZ, 1H), 8.22-8.27 (m, 3H), 8.17 (d,  $J=7.6$  HZ, 1H), 8.13 (d,  $J=9.2$  HZ, 1H), 8.03-8.08 (m, 3H), 7.81 (d,  $J=7.6$  HZ, 1H), 7.64 (t,  $J=7.6$  HZ, 1H), 7.34-7.48 (m, 6H), 7.22 (t,  $J=7.6$  HZ, 1H), 6.75 (d,  $J=6.1$  HZ, 1H), 5.68 (d,  $J=8.4$  HZ, 1H), 4.78 (d,  $J=8.4$  HZ, 1H), 4.20 (t,  $J=7.6$  HZ, 1H).  $^{13}C$  NMR (150 MHz,  $CDCl_3$ )  $\delta$  165.2, 163.8, 146.6, 145.4, 142.5, 139.8, 136.3, 133.4, 133.0, 133.0, 132.4, 131.0, 130.9, 130.1, 123.0, 129.5, 129.1, 128.9, 128.4, 128.4, 128.1, 127.9, 127.3, 126.9, 126.6, 122.9, 122.3, 120.7, 119.7, 114.4, 113.4, 110.3, 99.4, 86.2, 77.3, 77.1, 76.9, 73.7, 70.8, 65.6, 53.5, 30.7, 19.3, 13.82. MS(ESI) calcd  $C_{33}H_{29}N_4O_2$  for  $[M+H]^+$ : 633.2278, found 633.2277.

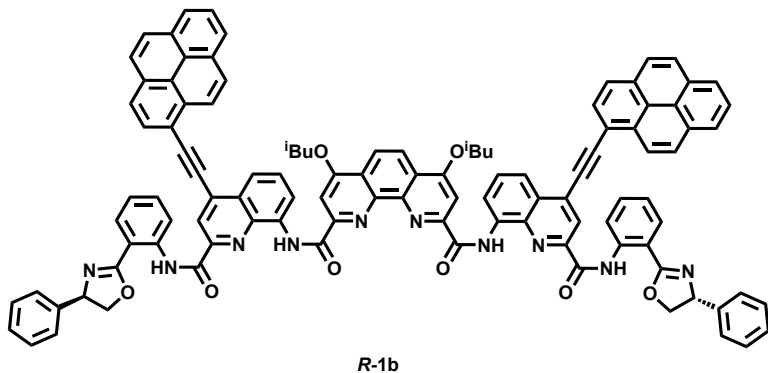

**Compound R-1b:** 30 mg compound **10** was put into reaction, and 35 mg orange solid was gained as product, yield: 30%. <sup>1</sup>H NMR (400 MHz, CDCl<sub>3</sub>) δ 13.11 (s, 1H), 12.88 (s, 1H), 9.0 (d, *J*=7.3 Hz, 1H), 8.94 (d, *J*=8.3 Hz, 1H), 8.33 (s, 1H), 8.31 (d, *J*=7.3 Hz, 1H), 8.29 (d, *J*=11.0 Hz, 1H), 8.04 (t, *J*=8.7 Hz, 1H), 7.83 (d, *J*=7.3 Hz, 1H), 7.72-7.78 (m, 4H), 7.68 (d, *J*=7.3 Hz, 1H), 7.5 (dd, *J*=2.8, 8.3 Hz, 1H), 7.44 (s, 1H), 7.23 (dd, *J*=1.8, 9.2 Hz, 1H), 7.18 (d, *J*=7.3 Hz, 1H), 7.10 (dd, *J*=1.83, 7.3 Hz, 1H), 6.94 (t, *J*=7.3 Hz, 1H), 6.81-6.85 (m, 3H), 6.57 (dd, *J*=1.8, 7.3 Hz, 2H), 4.15 (t, *J*=9.2 Hz, 1H), 4.06 (d, *J*=9.2 Hz, 1H), 3.53 (dd, *J*=4.6, 10.1 Hz, 1H), 3.34 (dd, *J*=8.3, 7.3 Hz, 1H), 2.88 (dd, *J*=8.3, 7.3 Hz, 1H), 2.42 (m, 1H), 1.26 (d, *J*=6.4 Hz, 7H). <sup>13</sup>C NMR (150 MHz, CDCl<sub>3</sub>) δ 162.9, 162.3, 162.2, 161.8, 151.0, 147.3, 144.6, 141.4, 139.1, 137.4, 135.0, 132.4, 131.5, 131.1, 130.8, 130.5, 130.3, 129.6, 129.5, 128.4, 128.3, 128.1, 128.0, 127.8, 127.2, 126.2, 126.0, 125.6, 125.4, 124.7, 123.5, 123.2, 122.0, 122.0, 121.8, 121.0, 120.5, 120.0, 118.5, 115.9, 114.2, 100.7, 99.3, 90.9, 77.3, 77.1, 76.9, 75.6, 72.2, 69.4, 29.8, 28.3, 19.4, 19.4. MS(ESI) calcd C<sub>108</sub>H<sub>77</sub>N<sub>8</sub>O<sub>10</sub> for [M+H]<sup>+</sup>: 1641.5920, found 1641.5918.

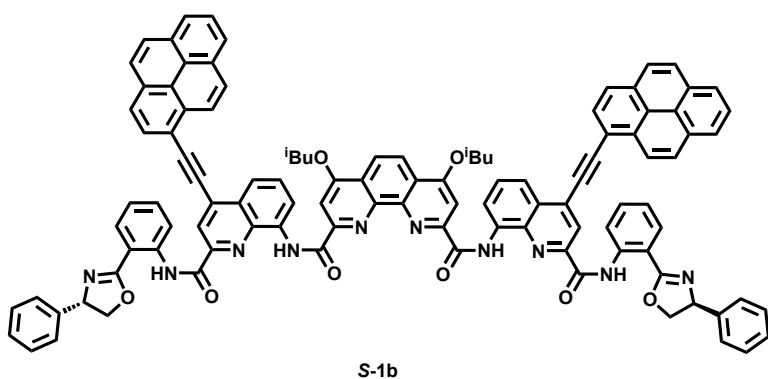

**Compound S-1b:** 30 mg compound **10** was put into reaction, and 58 mg orange solid was gained as product, yield: 50%. <sup>1</sup>H NMR (400 MHz, CDCl<sub>3</sub>) δ 13.11 (s, 1H), 12.88 (s, 1H), 9.0 (d, *J*=7.3 Hz, 1H), 8.94 (d, *J*=8.3 Hz, 1H), 8.33 (s, 1H), 8.31 (d, *J*=7.3 Hz, 1H), 8.29 (d, *J*=11.0 Hz, 1H), 8.04 (t, *J*=8.7 Hz, 1H), 7.83 (d, *J*=7.3 Hz, 1H), 7.72-7.78 (m, 4H), 7.68 (d, *J*=7.3 Hz, 1H), 7.5 (dd, *J*=2.8, 8.3 Hz, 1H), 7.44 (s, 1H), 7.23 (dd, *J*=1.8, 9.2 Hz, 1H), 7.18 (d, *J*=7.3 Hz, 1H), 7.10 (dd, *J*=1.83, 7.3 Hz, 1H), 6.94 (t, *J*=7.3 Hz, 1H), 6.81-6.85 (m, 3H), 6.57 (dd, *J*=1.8, 7.3 Hz, 2H), 4.15 (t, *J*=9.2 Hz, 1H), 4.06 (d, *J*=9.2 Hz, 1H), 3.53 (dd, *J*=4.6, 10.1 Hz, 1H), 3.34 (dd, *J*=8.3, 7.3 Hz, 1H), 2.88 (dd, *J*=8.3, 7.3 Hz, 1H), 2.42 (m, 1H), 1.26 (d, *J*=6.4 Hz, 7H). <sup>13</sup>C NMR (150 MHz, CDCl<sub>3</sub>) δ 162.9, 162.3, 162.1, 161.8, 151.0, 147.3, 144.6, 141.4, 139.0, 137.4, 135.0, 132.4, 131.5, 131.1, 130.8, 130.5, 130.3, 129.6, 129.6, 128.4, 128.3, 128.2, 128.0, 127.8, 127.2, 126.3, 126.0, 125.6, 125.4, 124.7, 123.6, 123.2, 122.0, 121.9, 121.8, 121.0, 120.5, 120.1, 118.5, 115.9, 114.2, 100.7, 99.3, 90.9, 77.3, 77.1, 76.9, 75.6, 72.2, 69.4, 30.7, 29.8, 29.4, 28.3, 22.8, 19.4, 19.4, 19.3, 14.2, 13.8. MS(ESI) calcd C<sub>108</sub>H<sub>77</sub>N<sub>8</sub>O<sub>10</sub> for [M+H]<sup>+</sup>: 1641.5920, found 1641.5911.

## Synthesis of helicities of *S/R*-PCQ<sub>2</sub>-b.

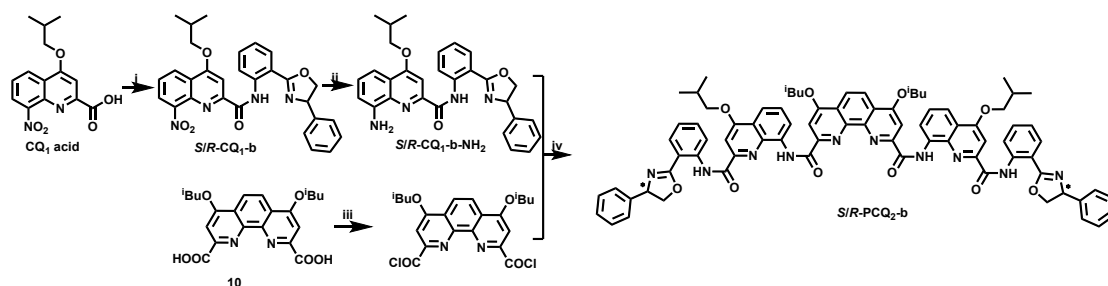

**Scheme S2** Synthesis of compound *S/R*-PCQ<sub>2</sub>-b. Conditions: i. HATU, DIEA, anhydrous DMF, *S*- or *R*- chiral amines; ii. Iron powder, CH<sub>3</sub>COOH, MeOH, reflux; iii. C<sub>2</sub>Cl<sub>2</sub>O<sub>2</sub>, dry DCM, room temperature; iv. DIEA, anhydrous DCM, room temperature.

**General procedures for Compound *S/R*-CQ<sub>1</sub>-b:** 0.2 mmol compound CQ<sub>1</sub> acid and 0.2 mmol compound chiral amine, 0.24 mmol (1.2 equiv.) 2-(7-Azabenzotriazol-1-yl)-N,N,N',N'-tetramethyluronium hexafluorophosphate (HATU) was dissolved in 3 mL anhydrous DMF, and then 0.4 mmol (2.0 equiv.) N,N-Diisopropylethylamine was added. The mixture was stirred at room temperature for overnight. Then the solution was dissolved in 20 mL DCM, and was washed by saturated NH<sub>4</sub>Cl solution. After the organic layer was dried and solute was removed, the crude was purified by column chromatography (SiO<sub>2</sub>, Hexane/DCM stepwise elution, 10:1 to 5:1).

General procedures for **compound *S/R*-CQ<sub>1</sub>-b-NH<sub>2</sub>**: 0.15mmol compound *S/R*-CQ<sub>1</sub>-b was dissolved in 5 mL ethyl acetate with 80 mg **10% wt. Palladium on activated carbon**. The solution was stirred at hydrogen atmosphere at room temperature for overnight. After the catalyst was filtered with silica and solvent removed at vacuum, the target product was gained without further purification.

General procedures for compound *S/R*-PCQ<sub>2</sub>-b: 0.1 mmol (1.0 equiv.) **compound 10** was suspended in anhydrous CH<sub>2</sub>Cl<sub>2</sub> (2 mL) under argon. 0.5 mmol (5 equiv.) **oxalyl chloride** were added carefully to the mixture because of gas evolution. The reaction slowly turned to a yellow homogeneous solution over 2 h. The solution was concentrated in vacuo to give the acid chloride as a yellow solid, which was pumped dry for 2 h. 0.2 mmol (2.0 equiv.) **compound *S/R*-CQ<sub>1</sub>-b-NH<sub>2</sub>** and 0.5 mmol (5.0 equiv.) **N, N-diisopropylethylamine** were dissolved in anhydrous CH<sub>2</sub>Cl<sub>2</sub> (3 mL) under argon with stirring. The acid chloride was dissolved in anhydrous CH<sub>2</sub>Cl<sub>2</sub> (5 mL), then were added into amine liquor immediately. After stirring for overnight, TLC analysis indicated completion of the reaction. The mixture extracted with CH<sub>2</sub>Cl<sub>2</sub>. The resultant crude material was purified by column chromatography (SiO<sub>2</sub>, Hexane/DCM stepwise elution, 10:1 to 2:1) to give compounds Cod-68 as a light-yellow solid.

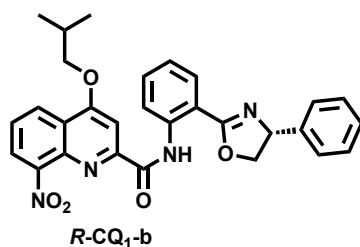

Compound *R*-CQ<sub>1</sub>-b: 85 mg **compound *R*-CQ<sub>1</sub>-b** was gained as pale white solid, yield 84%. <sup>1</sup>H NMR (600 MHz, CDCl<sub>3</sub>) δ 13.49 (s, 1H), 9.02 (dd, *J* = 8.5, 1.2 Hz, 1H), 8.45 (dd, *J* = 8.4, 1.5 Hz, 1H), 8.03 (dd, *J* = 7.9, 1.7 Hz, 1H), 7.99 (dd, *J* = 7.4, 1.5 Hz, 1H), 7.88 (s, 1H), 7.60 – 7.54 (m, 2H), 7.27 (d, *J* = 1.7 Hz, 1H), 7.26 (d, *J* = 1.0 Hz, 1H), 7.22 – 7.17 (m, 3H), 7.16 – 7.12 (m, 1H), 5.91 (dd, *J* = 10.0, 6.4 Hz, 1H), 4.81 (dd, *J* = 10.0, 8.1 Hz, 1H), 4.31 (dd, *J* = 8.1, 6.4 Hz, 1H), 4.23 – 4.06 (m, 2H), 2.31 (dt, *J* = 13.4, 6.7 Hz, 1H), 1.14 (dd, *J* = 6.7, 0.8 Hz, 7H). <sup>13</sup>C NMR (150 MHz, CDCl<sub>3</sub>) δ 163.9, 163.6, 163.1, 154.6, 148.1, 143.2, 139.3, 132.4, 129.8, 128.4, 127.1, 126.6, 126.4, 125.3, 124.9, 123.4, 123.3, 120.8, 115.5, 100.6, 77.3, 77.2, 77.1, 77.0, 76.9, 75.7, 74.0, 69.7, 28.2, 19.3. MS(ESI) calcd C<sub>29</sub>H<sub>27</sub>N<sub>4</sub>O<sub>5</sub> for [M+H]<sup>+</sup>: 511.1975, found 511.1979.

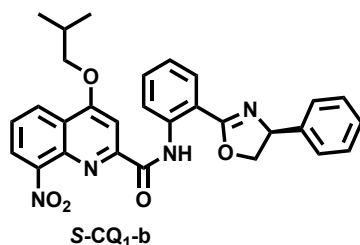

Compound *S*-CQ<sub>1</sub>-b: <sup>1</sup>H NMR (400 MHz, Chloroform-*d*) δ 13.49 (s, 1H), 9.02 (dd, *J* = 8.6, 1.2 Hz, 1H), 8.45 (dd, *J* = 8.4, 1.4 Hz, 1H), 8.03 (dd, *J* = 7.9, 1.7 Hz, 1H), 7.99 (dd, *J* = 7.5, 1.4 Hz, 1H), 7.88 (s, 1H), 7.61 – 7.53 (m, 2H), 7.28 (d, *J* = 1.8 Hz, 1H), 7.24 – 7.16 (m, 4H), 7.14 (d, *J* = 7.1 Hz, 1H), 5.91 (dd, *J* = 10.0, 6.4 Hz, 1H), 4.81 (dd, *J* = 10.0, 8.1 Hz, 1H), 4.31 (dd, *J* = 8.2, 6.5 Hz, 2H), 4.13 (t, *J* = 6.7 Hz, 2H), 2.30 (dt, *J* = 13.3, 6.7 Hz, 1H), 1.18 – 1.11 (m, 7H). <sup>13</sup>C

NMR (100 MHz, CDCl<sub>3</sub>)  $\delta$  163.9, 163.6, 163.1, 143.2, 139.3, 132.4, 129.8, 128.4, 127.2, 126.6, 126.4, 125.3, 124.9, 123.4, 123.3, 120.8, 115.5, 100.6, 77.4, 77.1, 76.8, 75.7, 74.0, 69.7, 28.2, 19.3. MS(ESI) calcd C<sub>29</sub>H<sub>27</sub>N<sub>4</sub>O<sub>5</sub> for [M+H]<sup>+</sup>: 511.1975, found 511.1980.

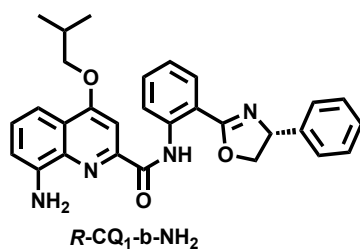

Compound **R-CQ<sub>1</sub>-b-NH<sub>2</sub>**: 80 mg **compound R-CQ<sub>1</sub>-b** was gained as pale white solid, yield 79%. <sup>1</sup>H NMR (400 MHz, CDCl<sub>3</sub>)  $\delta$  13.50 (s, 1H), 9.02 (dd, *J* = 8.5, 1.1 Hz, 1H), 7.94 (dd, *J* = 7.9, 1.7 Hz, 1H), 7.59 (s, 1H), 7.50 (dd, *J* = 8.7, 1.7 Hz, 1H), 7.36 (dd, *J* = 8.3, 1.2 Hz, 1H), 7.32 – 7.19 (m, 7H), 7.19 – 7.11 (m, 2H), 7.11 – 7.07 (m, 2H), 7.07 – 7.02 (m, 1H), 6.65 (s, 1H), 6.59 (d, *J* = 1.2 Hz, 1H), 6.57 – 6.55 (m, 1H), 5.55 (dd, *J* = 10.1, 7.7 Hz, 1H), 4.63 (dd, *J* = 10.2, 8.2 Hz, 1H), 4.21 (t, *J* = 6.7 Hz, 1H), 4.08 – 4.03 (m, 1H), 3.93 (d, *J* = 6.5 Hz, 3H), 2.15 (dt, *J* = 13.3, 6.6 Hz, 1H), 1.01 (d, *J* = 6.7 Hz, 6H). <sup>13</sup>C NMR (100 MHz, CDCl<sub>3</sub>)  $\delta$  165.1, 164.6, 163.1, 148.7, 144.7, 142.5, 139.8, 137.4, 132.9, 130.1, 129.4, 129.1, 129.0, 128.0, 126.6, 122.8, 120.6, 118.6, 115.2, 114.5, 110.5, 109.6, 98.8, 77.5, 77.2, 76.8, 75.0, 73.7, 70.8, 29.8, 28.3, 19.3. MS(ESI) calcd C<sub>29</sub>H<sub>29</sub>N<sub>4</sub>O<sub>3</sub> for [M+H]<sup>+</sup>: 481.2234, found 481.2230.

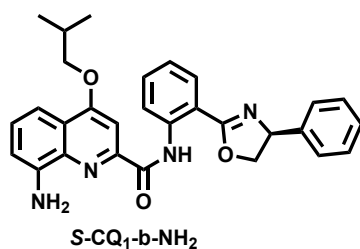

Compound **S-CQ<sub>1</sub>-b-NH<sub>2</sub>**: <sup>1</sup>H NMR (400 MHz, CDCl<sub>3</sub>)  $\delta$  13.60 (s, 1H), 9.11 (dd, *J* = 8.5, 1.1 Hz, 1H), 8.05 (dd, *J* = 7.9, 1.7 Hz, 1H), 7.70 (s, 1H), 7.61 (dd, *J* = 8.8, 1.7 Hz, 1H), 7.46 (dd, *J* = 8.3, 1.2 Hz, 1H), 7.42 – 7.30 (m, 6H), 7.23 – 7.18 (m, 1H), 7.18 – 7.14 (m, 1H), 6.79 – 6.73 (m, 1H), 6.71 – 6.68 (m, 1H), 6.67 (dd, *J* = 2.7, 1.1 Hz, 1H), 5.67 (dd, *J* = 10.2, 7.8 Hz, 1H), 4.76 (dd, *J* = 10.2, 8.2 Hz, 1H), 4.48 (s, 2H), 4.18 (t, *J* = 8.0 Hz, 1H), 4.06 (d, *J* = 6.5 Hz, 2H), 2.26 (dt, *J* = 13.3, 6.6 Hz, 1H), 1.12 (d, *J* = 6.7 Hz, 7H). <sup>13</sup>C NMR (100 MHz, CDCl<sub>3</sub>)  $\delta$  165.1, 164.6, 163.1, 148.7, 144.7, 142.5, 139.9, 137.4, 132.9, 130.1, 129.4, 129.1, 128.8, 128.0, 126.6, 122.9, 122.8, 120.6, 115.2, 114.5, 110.4, 109.5, 98.8, 77.5, 77.2, 76.8, 75.0, 73.7, 70.8, 28.3, 19.4. MS(ESI) calcd C<sub>29</sub>H<sub>29</sub>N<sub>4</sub>O<sub>3</sub> for [M+H]<sup>+</sup>: 481.2234, found 481.2229.

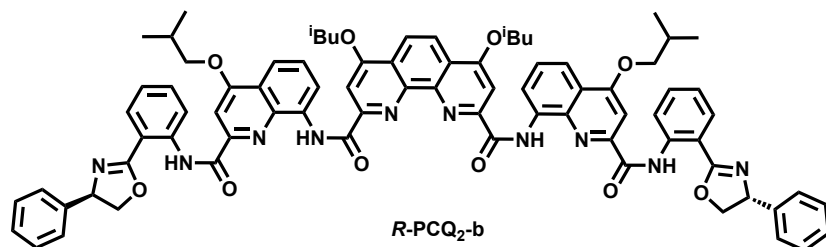

Compound **R-PCQ<sub>2</sub>-b**: <sup>1</sup>H NMR (600 MHz, CDCl<sub>3</sub>)  $\delta$  12.97 (s, 1H), 12.93 (s, 1H), 8.87 (dd, *J* = 8.3, 1.2 Hz, 1H), 8.79 (dd, *J* = 7.5, 1.4 Hz, 1H), 8.26 (s, 1H), 7.66 (s, 1H), 7.64 – 7.60 (m, 1H), 7.58 (dd, *J* = 8.7, 1.8 Hz, 1H), 7.30 (s, 1H), 7.05 (dd, *J* = 7.7, 1.7 Hz, 1H), 6.87 (td, *J* = 7.5, 1.2 Hz, 1H), 6.85 – 6.82 (m, 1H), 6.82 – 6.78 (m, 3H), 6.53 (d, *J* = 1.2 Hz, 1H), 6.51 (d, *J* = 1.7 Hz, 1H), 4.31 (t, *J* = 6.7 Hz, 1H), 4.08 (dd, *J* = 8.6, 6.3 Hz, 1H), 3.99 (dd, *J* = 8.6, 6.7 Hz, 1H), 3.87 (dd, *J* = 8.7, 6.1 Hz, 1H), 3.74 (dd, *J* = 8.7, 7.3 Hz, 1H), 3.41 (dd, *J* = 9.9, 8.0 Hz, 1H), 3.28 (t, *J* = 7.8 Hz, 1H), 2.85 (dd,

$J = 9.9, 7.6$  Hz, 1H), 2.37 (dt,  $J = 13.3, 6.6$  Hz, 1H), 2.23 (dt,  $J = 13.4, 6.7$  Hz, 1H), 1.24 (dd,  $J = 11.4, 6.8$  Hz, 9H), 1.14 (dd,  $J = 10.6, 6.7$  Hz, 7H).  $^{13}\text{C}$  NMR (150 MHz,  $\text{CDCl}_3$ )  $\delta$  167.8, 163.0, 162.8, 162.0, 161.9, 161.5, 151.0, 149.4, 144.5, 141.4, 139.1, 138.4, 134.4, 132.4, 132.2, 131.0, 128.9, 128.4, 128.2, 127.4, 127.1, 126.0, 121.8, 121.8, 121.7, 121.1, 120.3, 118.2, 115.4, 114.1, 100.4, 98.3, 77.3, 77.1, 76.9, 75.5, 75.0, 72.1, 69.3, 65.6, 30.7, 28.3, 28.2, 19.4, 19.4, 19.3, 19.3, 19.3, 13.8. MS(ESI) calcd  $\text{C}_{11}\text{H}_8\text{N}_2\text{O}_4\text{Br}$  for  $[\text{M}+\text{H}]^+$ : 310.9662, found 310.9667.

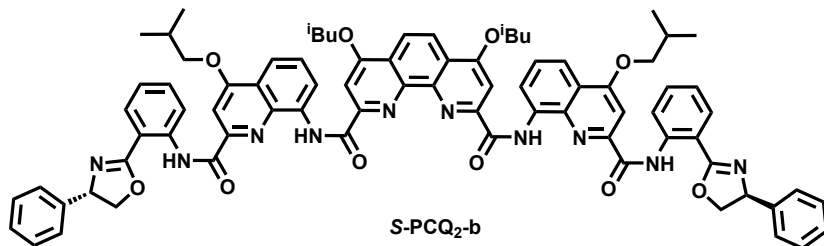

Compound **S-PCQ<sub>2</sub>-b**:  $^1\text{H}$  NMR (600 MHz,  $\text{CDCl}_3$ )  $\delta$  12.97 (s, 1H), 12.93 (s, 1H), 8.87 (d,  $J = 8.0$  Hz, 1H), 8.79 (d,  $J = 6.9$  Hz, 1H), 8.25 (s, 1H), 7.67 (d,  $J = 8.0$  Hz, 1H), 7.61 (d,  $J = 8.0$  Hz, 1H), 7.58 (d,  $J = 9.2$  Hz, 1H), 7.30 (s, 1H), 7.05 (d,  $J = 9.2$  Hz, 1H), 6.88 (d,  $J = 6.9$  Hz, 1H), 6.84 (d,  $J = 86.9$  Hz, 1H), 6.78-6.81 (m, 3H), 6.52 (s, 1H), 6.51 (s, 1H), 4.07 (dd,  $J = 8.0, 6.9$  Hz, 1H), 3.99 (t,  $J = 6.9$  Hz, 1H), 3.87 (dd,  $J = 5.8, 5.8$  Hz, 1H), 3.74 (t,  $J = 8.0$  Hz, 1H), 3.41 (dd,  $J = 8.0, 9.2$  Hz, 1H), 3.28 (t,  $J = 8.0$  Hz, 1H), 2.86 (t,  $J = 8.0$  Hz, 1H), 2.834-3.41 (m, 1H), 2.20-2.67 (m, 1H), 1.22 (dd,  $J = 6.9, 5.8$  Hz, 1H), 1.15 (dd,  $J = 10.3, 6.9$  Hz, 1H).  $^{13}\text{C}$  NMR (100 MHz,  $\text{CDCl}_3$ )  $\delta$  163.0, 162.8, 161.9, 161.5, 151.00, 149.3, 144.4, 141.4, 139.1, 138.4, 134.4, 132.1, 128.3, 128.2, 127.4, 127.1, 126.0, 121.8, 121.0, 120.3, 118.2, 115.4, 114.1, 100.4, 98.3, 77.4, 77.1, 76.8, 75.5, 75.0, 72.1, 69.3, 28.3, 28.2, 19.5, 19.4, 19.3. MS(ESI) calcd  $\text{C}_{11}\text{H}_8\text{N}_2\text{O}_4\text{Br}$  for  $[\text{M}+\text{H}]^+$ : 310.9662, found 310.9659.

## Synthesis of helicities of *S*-2a and *S*-2b.

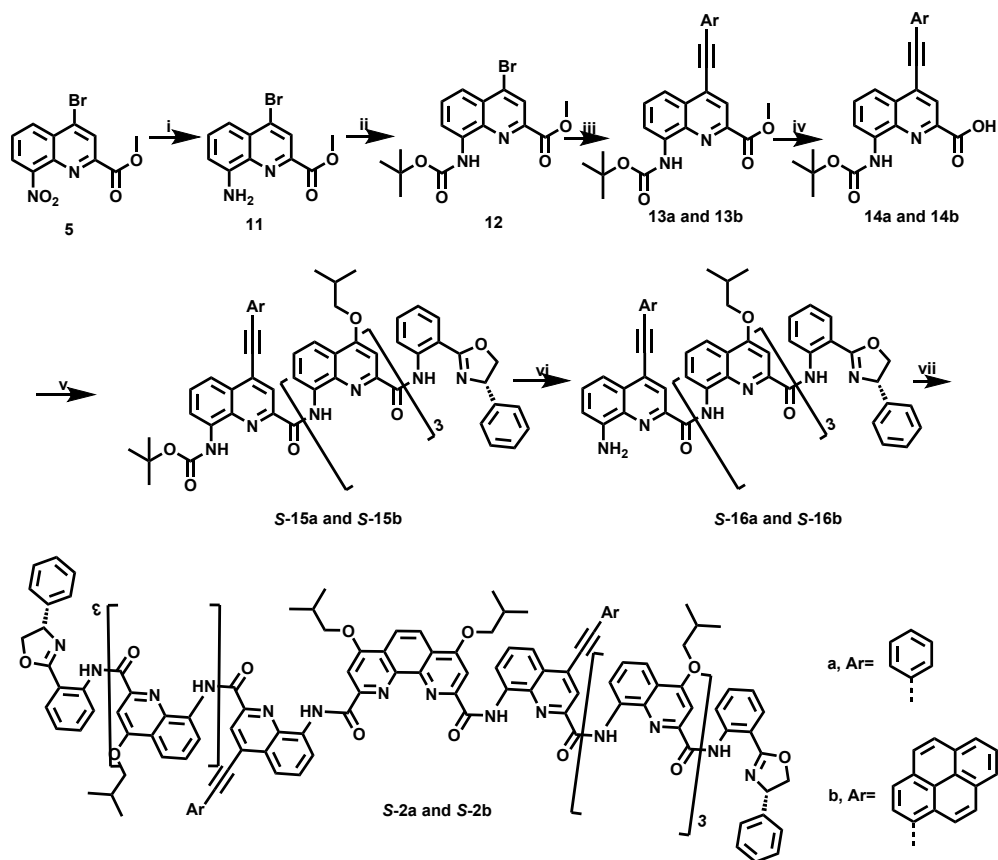

**Scheme S3** Synthesis of compound *S/R*-1a~1b. Conditions: i. Iron powder, CH<sub>3</sub>COOH, MeOH, reflux; ii. (BOC)<sub>2</sub>O, 1,2-dioxane, 100 °C; iii. Pd(PPh<sub>3</sub>)<sub>2</sub>Cl<sub>2</sub>, CuI, anhydrous THF and anhydrous Et<sub>3</sub>N, **aromatic acetylene**, room temperature; iv. NaOH, THF/MeOH, 40°C; v. C<sub>2</sub>Cl<sub>2</sub>O<sub>2</sub>, dry DCM, room temperature; DIEA, anhydrous DCM, Q3-NH<sub>2</sub>-b-NH<sub>2</sub>, room temperature; vi. CF<sub>3</sub>COOH, DCM, room temperature; vii. C<sub>2</sub>Cl<sub>2</sub>O<sub>2</sub>, dry DCM, room temperature; DIEA, anhydrous DCM, room temperature.

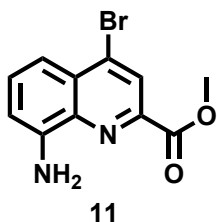

**Compound 11**: a dark red solid. Yield: 78 %. <sup>1</sup>H NMR (600 MHz, CDCl<sub>3</sub>) δ 8.40 (s, 1H), 7.50 (d, *J* = 6.9 Hz, 1H), 7.46 (d, *J* = 6.9 Hz, 1H), 6.97 (d, *J* = 6.9 Hz, 1H), 5.24 (s, 2H), 4.03 (s, 3H). <sup>13</sup>C NMR (100 MHz, CDCl<sub>3</sub>) δ 164.99, 145.67, 143.98, 137.66, 134.75, 131.28, 129.75, 125.33, 114.31, 111.09, 77.42, 77.10, 76.78, 53.02. MS(ESI) calcd C<sub>11</sub>H<sub>8</sub>N<sub>2</sub>O<sub>4</sub>Br for [M+H]<sup>+</sup>: 310.9662, found 310.9659.

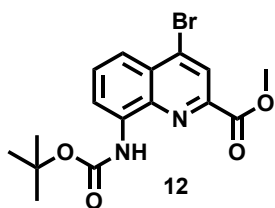

**Compound 12:** 190 mg (yield: 78%) compound 12 was gained as light-yellow solid.  $^1\text{H NMR}$  (600 MHz,  $\text{CDCl}_3$ )  $\delta$  8.99 (s, 1H), 8.56 (d,  $J = 7.5$  Hz, 1H), 8.45 (s, 1H), 7.78 (d,  $J = 8.1$  Hz, 1H), 7.70 (t,  $J = 8.1$  Hz, 1H), 4.07 (s, 3H), 1.59 (s, 9H).  $^{13}\text{C NMR}$  (150 MHz,  $\text{CDCl}_3$ )  $\delta$  164.6, 152.7, 144.9, 137.9, 136.7, 135.4, 131.1, 129.0, 125.5, 118.9, 116.0, 81.2, 77.3, 77.1, 76.9, 53.2, 28.4. MS(ESI) calcd  $\text{C}_{80}\text{H}_{77}\text{N}_{10}\text{O}_{10}$  for  $[\text{M}+\text{H}]^+$ : 1337.5819, found 1337.5801.

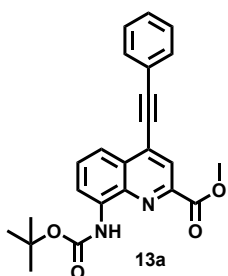

**Compound 13b:** 185 mg **compound 13a** was gained, yield: 86%.  $^1\text{H NMR}$  (600 MHz,  $\text{CDCl}_3$ )  $\delta$  9.02 (s, 1H), 8.54 (d,  $J = 8.0$  Hz, 1H), 8.33 (s, 1H), 7.97 (d,  $J = 9.2$  Hz, 1H), 7.73 – 7.64 (m, 3H), 7.48 – 7.40 (m, 3H), 4.08 (s, 3H), 1.60 (s, 10H).  $^{13}\text{C NMR}$  (150 MHz,  $\text{CDCl}_3$ )  $\delta$  165.4, 152.8, 145.0, 137.7, 136.7, 132.1, 131.4, 130.4, 129.7, 128.9, 128.7, 124.1, 122.0, 118.1, 115.6, 100.0, 85.0, 81.0, 77.3, 77.1, 76.9, 53.1, 28.5. MS(ESI) calcd  $\text{C}_{24}\text{H}_{23}\text{N}_2\text{O}_4$  for  $[\text{M}+\text{H}]^+$ : 403.1652, found 403.1646.

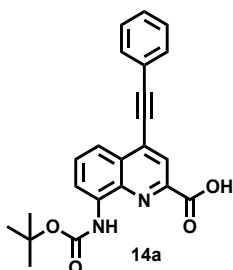

**Compound 14a:** 110 mg brown solid was gained as product. Yield: 95%.  $^1\text{H NMR}$  (400 MHz,  $\text{CDCl}_3$ )  $\delta$  8.60 (d,  $J = 7.9$  Hz, 1H), 8.54 (s, 1H), 8.47 (s, 1H), 8.07 (dd,  $J = 8.4, 1.3$  Hz, 1H), 7.76 (t,  $J = 8.1$  Hz, 1H), 7.71 – 7.66 (m, 2H), 7.48 – 7.42 (m, 3H), 1.62 (s, 3H). MS(ESI) calcd  $\text{C}_{23}\text{H}_{19}\text{N}_2\text{O}_4$  for  $[\text{M}-\text{H}]^-$ : 387.1350, found 387.1352.

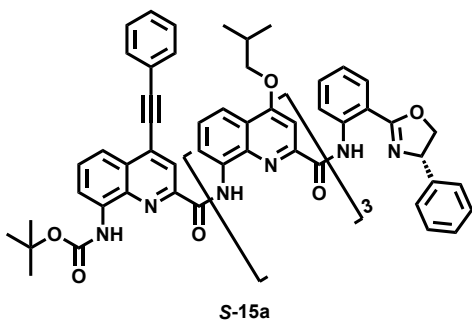

Compound **S-15a**: 220 mg Yellow solid was gained. Yield: 65%.  $^1\text{H NMR}$  (600 MHz,  $\text{CDCl}_3$ )  $\delta$  13.11 (s, 1H), 12.33 (s, 1H), 11.69 (s, 1H), 11.67 (s, 1H), 8.83 (d,  $J=7.6$  Hz, 1H), 8.64 (d,  $J=8.3$  Hz, 1H), 8.57 (d,  $J=7.8$  Hz, 1H), 8.12 (s, 1H), 8.10 (s, 1H), 8.06 (d,  $J=7.6$  Hz, 1H), 8.04 (d,  $J=7.6$  Hz, 1H), 8.02 (d,  $J=7.6$  Hz, 1H), 8.00 (d,  $J=7.6$  Hz, 1H), 7.98 (d,  $J=7.6$  Hz, 1H), 7.82 (d,  $J=2.2$  Hz, 1H), 7.68 (s, 1H), 7.66 (s, 1H), 7.53 (s, 1H), 7.51 (d,  $J=6.4$  Hz, 1H), 7.46 – 7.42 (m, 2H), 7.33 (d,  $J=8.1$  Hz, 1H), 7.31 (d,  $J=8.1$  Hz, 1H), 6.85 (s, 1H), 6.84 (s, 1H), 6.77 (d,  $J=7.0$  Hz, 1H), 6.71 (d,  $J=7.8$  Hz, 1H), 6.42 (s, 1H), 6.41 (s, 1H), 4.44 – 4.33 (m, 1H), 4.20 – 4.12 (m, 1H), 4.03 – 3.97 (m, 1H), 3.97 – 3.84 (m, 4H), 3.43 – 3.36 (m, 1H), 3.14 – 3.06 (m, 1H), 2.89 – 2.84 (m, 1H), 2.52 (m, 1H), 2.33 (m, 1H), 1.44 – 1.12 (m, 70H).  $^{13}\text{C NMR}$  (150 MHz,  $\text{CDCl}_3$ )  $\delta$  163.6, 163.3, 163.2, 162.7, 162.7, 162.2, 160.9, 160.5, 151.7, 150.5, 149.6, 149.4, 147.7, 141.2, 139.0, 138.4, 137.9, 135.9, 135.0, 134.5, 133.8, 133.45, 132.4, 132.3, 131.8, 129.7, 129.5, 129.1, 128.7, 128.5, 128.2, 127.4, 127.1, 127.0, 125.8, 123.0, 122.6, 122.5, 122.4, 121.9, 121.5, 120.4, 118.6, 117.3, 116.8, 116.3, 115.8, 114.7, 114.2, 99.9, 99.7, 98.7, 97.8, 85.8, 80.8, 77.3, 77.1, 76.9, 75.6, 75.5, 75.2, 72.3, 69.2, 32.0, 29.8, 29.4, 28.4, 28.3, 28.3, 27.9, 22.8, 19.6, 19.5, 19.5, 19.4, 19.4, 14.2. MS(ESI) calcd  $\text{C}_{80}\text{H}_{75}\text{N}_{10}\text{O}_{10}$  for  $[\text{M-H}]^-$ : 1335.5662, found 1335.5654.

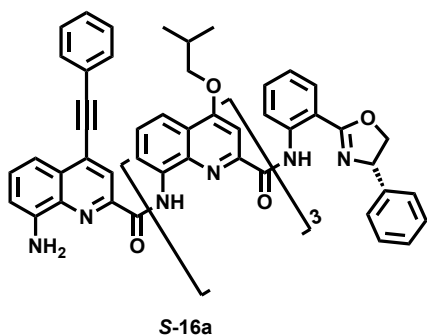

Compound **S-16a**: 220 mg compound cod-137(S) (0.165 mmol, 1equiv.). Yield: 70%.  $^1\text{H NMR}$  (400 MHz,  $\text{CDCl}_3$ )  $\delta$  13.05 (s, 1H), 12.29 (s, 1H), 11.67 (s, 1H), 11.55 (s, 1H), 8.75 (d,  $J=7.6$  Hz, 1H), 8.58 (d,  $J=8.3$  Hz, 1H), 8.46 (d,  $J=7.6$  Hz, 1H), 8.06 (d,  $J=6.8$  Hz, 1H), 8.02 – 7.97 (m, 3H), 7.94 (dd,  $J=8.3, 1.1$  Hz, 1H), 7.79 – 7.74 (m, 2H), 7.69 (d,  $J=8.1$  Hz), 7.67 (d,  $J=5.0$  Hz, 1H), 7.65 (d,  $J=3.6$  Hz, 1H), 7.62 (d,  $J=8.1$  Hz, 1H), 7.53 (dd,  $J=11.2, 4.1$  Hz, 1H), 7.47 – 7.43 (m, 3H), 7.32 (s, 1H), 7.28 (t,  $J=8.0$  Hz, 1H), 7.19 (dd,  $J=11.1, 4.1$  Hz, 1H), 7.13 (t,  $J=7.9$  Hz, 2H), 6.94 (s, 1H), 6.84 (s, 1H), 6.74 (d,  $J=7.0$  Hz, 1H), 6.69 (t,  $J=7.3$  Hz, 1H), 6.44 (s, 1H), 6.43 (s, 1H), 5.97 (d,  $J=7.6$  Hz, 1H), 4.36 – 4.26 (m, 1H), 4.15 – 4.08 (m, 1H), 4.04 – 3.94 (m, 1H), 3.94 – 3.81 (m, 3H), 3.79 (s, 2H), 3.39 (t,  $J=7.8$  Hz, 1H), 3.24 (t,  $J=8.7$  Hz, 1H), 2.95 (t,  $J=8.9$  Hz, 1H), 2.54 – 2.41 (m, 1H), 2.31 (m, 2H), 1.31 – 1.13 (m, 32H).  $^{13}\text{C NMR}$  (150 MHz,  $\text{CDCl}_3$ )  $\delta$  163.5, 163.3, 163.2, 162.8, 162.7, 160.9, 160.8, 150.3, 150.1, 149.4, 146.6, 144.0, 141.1, 138.7, 138.4, 137.9, 135.3, 134.8, 133.8, 133.7, 132.3, 131.8, 131.2, 129.8, 129.6, 129.3, 128.8, 128.6, 128.2, 127.4, 127.1, 125.8, 122.9, 122.5, 122.3, 121.9, 121.6, 120.4, 117.5, 116.8, 116.7, 116.1, 116.0, 115.6, 114.2, 114.0, 109.4, 99.7, 98.9, 98.7, 98.2, 86.2, 77.3, 77.1, 76.9, 75.6, 75.5, 75.2, 72.3, 69.3, 32.0, 29.8, 29.4, 28.4, 28.3, 22.8, 19.6, 19.5, 19.4, 19.3, 14.2. MS(ESI) calcd  $\text{C}_{75}\text{H}_{66}\text{N}_{10}\text{O}_8$  for  $[\text{M-H}]^-$ : 1257.4957, found 1257.4958.

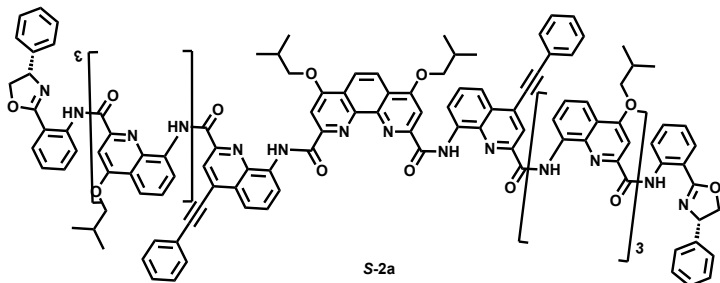

Compound **S-2a**: Yellow solid was gained.  $^1\text{H NMR}$  (600 MHz,  $\text{CDCl}_3$ )  $\delta$  12.36 (s, 1H), 12.03 (s, 1H), 11.01 (s, 1H), 10.94 (s, 1H), 10.71 (s, 1H), 8.07 (d,  $J=8.0$  Hz, 1H), 8.05 (d,  $J=9.2$  Hz, 1H), 8.01 (d,  $J=8.0$  Hz, 1H), 7.93 (d,  $J=8.0$  Hz, 1H), 7.89 (d,  $J=8.0$  Hz, 1H), 7.81 (d,  $J=8.0$  Hz, 1H), 7.75 (s, 1H), 7.74 (s, 1H), 7.71 (dd,  $J=3.5, 9.2$  Hz, 1H), 7.52–7.54 (m, 3H), 7.50 (d,  $J=8.0$  Hz, 1H), 7.49 (s, 1H), 7.44 (t,  $J=8.0$  Hz, 1H), 7.41 (d,  $J=8.0$  Hz, 1H), 7.38 (d,  $J=8.0$  Hz, 1H), 7.35



(t,  $J=8.0$  Hz, 1H), 7.32 (d,  $J=6.9$  Hz, 1H), 7.30 (d,  $J=6.9$  Hz, 1H), 7.29 (d,  $J=6.9$  Hz, 1H), 7.16 (d,  $J=8.0, 6.9$  Hz, 1H), 7.08 (t,  $J=6.9$  Hz, 1H), 6.91 (s, 1H), 6.88 (t,  $J=6.9$  Hz, 1H), 6.57 (s, 1H), 6.56 (t,  $J=6.9$  Hz, 1H), 6.48 (d,  $J=8.0$  Hz, 1H), 6.46 (d,  $J=6.9$  Hz, 1H), 6.43 (s, 1H), 6.26 (s, 1H), 6.12 (s, 1H), 6.11 (s, 1H), 6.10 (s, 1H), 3.85-3.88 (m, 4H), 3.79 (t,  $J=6.9$  Hz, 1H), 3.76 (t,  $J=6.9$  Hz, 1H), 3.63-3.68 (m, 2H), 3.08 (d,  $J=6.9$  Hz, 1H), 2.70 (t,  $J=9.2$  Hz, 1H), 2.57 (dd,  $J=5.8, 6.9$  Hz, 1H), 2.35-2.44 (m, 2H), 2.26-2.30 (m, 1H), 2.21-2.23 (m, 1H), 2.13-2.18 (m, 1H), 1.23-1.30 (m, 33H), 1.19 (d,  $J=6.9$  Hz, 3H), 1.12 (d,  $J=6.9$  Hz, 3H), 1.09 (d,  $J=6.9$  Hz, 3H).  $^{13}\text{C}$  NMR (100 MHz,  $\text{CDCl}_3$ )  $\delta$  167.8, 162.8, 162.6, 162.2, 161.9, 161.6, 160.4, 159.8, 159.6, 159.1, 148.8, 148.6, 147.5, 146.1, 142.5, 141.0, 138.6, 137.9, 137.7, 136.6, 135.7, 133.7, 133.5, 133.2, 133.0, 132.4, 131.2, 131.0, 130.4, 129.2, 128.9, 128.4, 127.9, 127.7, 127.3, 126.8, 126.5, 125.6, 123.0, 122.3, 121.6, 121.4, 120.8, 120.1, 119.8, 119.6, 119.1, 117.2, 116.8, 116.7, 116.6, 116.5, 116.1, 115.2, 113.7, 99.7, 98.8, 98.5, 98.1, 97.7, 85.7, 77.4, 77.3, 77.1, 76.8, 75.3, 75.1, 74.8, 71.9, 68.8, 68.2, 65.6, 38.8, 32.0, 30.7, 30.4, 29.8, 29.4, 29.0, 28.3, 28.2, 28.1, 23.8, 23.1, 22.8, 19.8, 19.7, 19.6, 19.5, 19.4, 19.3, 19.3, 14.2, 14.1, 13.8, 11.0. MS(ESI) calcd  $\text{C}_{172}\text{H}_{152}\text{N}_{22}\text{O}_{20}$  for  $[\text{M}+\text{H}]^+$ : 2848.1693, found 2848.1702.

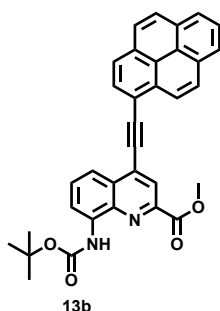

**Compound 13b:** Yield: 81%.  $^1\text{H}$  NMR (600 MHz,  $\text{CDCl}_3$ )  $\delta$  9.04 (s, 1H), 8.68 (d,  $J=9.0$  Hz, 1H), 8.56 (d,  $J=6.9$  Hz, 1H), 8.44 (s, 1H), 8.29 (d,  $J=7.9$  Hz, 1H), 8.24 (m, 3H), 8.17 – 8.10 (m, 3H), 8.09 – 8.02 (m, 3H), 7.74 (t,  $J=8.0$  Hz, 1H), 4.11 (s, 3H), 1.63 (s, 9H).  $^{13}\text{C}$  NMR (150 MHz,  $\text{CDCl}_3$ )  $\delta$  165.4, 152.8, 145.0, 137.7, 136.7, 132.4, 132.3, 131.6, 131.2, 131.0, 130.5, 130.2, 129.2, 129.0, 128.8, 128.5, 127.3, 126.5, 126.2, 126.2, 125.2, 124.7, 124.5, 124.2, 124.1, 118.2, 116.2, 115.6, 99.5, 90.6, 81.0, 77.3, 77.1, 76.9, 53.1, 28.5. MS(ESI) calcd  $\text{C}_{34}\text{H}_{27}\text{N}_2\text{O}_4$  for  $[\text{M}+\text{H}]^+$ : 527.1965, found 527.1959.

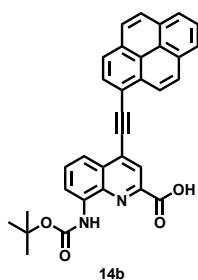

**Compound 14b:**  $^1\text{H}$  NMR (400 MHz,  $\text{CDCl}_3$ )  $\delta$  8.73 (d,  $J=9.1$  Hz, 1H), 8.66 (s, 1H), 8.36 (d,  $J=7.9$  Hz, 1H), 8.32 (d,  $J=8.8$  Hz, 1H), 8.29 (dd,  $J=8.6, 3.5$  Hz, 2H), 8.22 (d,  $J=7.9$  Hz, 1H), 8.20 (d,  $J=8.9$  Hz, 1H), 8.12 (d,  $J=5.9$  Hz, 1H), 8.10 (d,  $J=4.6$  Hz, 1H), 7.85 (t,  $J=8.1$  Hz, 1H), 7.65 (s, 1H), 7.52 (s, 1H), 6.99 (d,  $J=6.7$  Hz, 1H), 1.64 (s, 13H). Yield: 89 %. MS(ESI) calcd  $\text{C}_{33}\text{H}_{24}\text{N}_2\text{O}_4$  for  $[\text{M}-\text{H}]^-$ : 511.1654, found 511.1660.

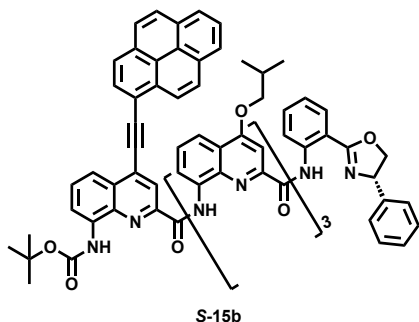

**Compound 15b:** 220 mg Yellow solid was gained. Yield: 30%.  $^{13}\text{C}$  NMR (600 MHz,  $\text{CDCl}_3$ )  $\delta$  13.13 (s, 1H), 12.34 (s, 1H), 11.70 (s, 1H), 11.69 (s, 1H), 8.91 (d,  $J=9.0$  Hz, 1H), 8.88 (d,  $J=7.6$  Hz, 1H), 8.68 (d,  $J=7.5$  Hz, 1H), 8.65 (d,  $J=8.2$  Hz, 1H), 8.48 (d,  $J=7.5$  Hz, 1H), 8.37 (d,  $J=9.1$  Hz, 1H), 8.32 (d,  $J=7.4$  Hz, 1H), 8.28 – 8.23 (m, 3H), 8.20 (d,  $J=8.2$  Hz, 1H), 8.17 (t,  $J=4.1$  Hz, 2H), 8.12 (d,  $J=8.7$  Hz, 1H), 8.11 – 8.04 (m, 3H), 8.01 (t,  $J=8.5$  Hz, 2H), 7.76 (t,  $J=7.9$  Hz, 1H), 7.71 (d,  $J=6.9$  Hz, 1H), 7.69 (d,  $J=7.8$  Hz, 1H), 7.63 – 7.54 (m, 2H), 7.44 (s, 1H), 7.41 (t,  $J=7.8$  Hz, 1H), 7.32 (t,  $J=7.9$  Hz, 1H), 7.24 (d,  $J=7.5$  Hz, 1H), 6.92 (s, 1H), 6.87 (s, 1H), 6.75 (t,  $J=7.0$  Hz, 1H), 6.70 (t,  $J=7.4$  Hz, 2H), 6.44 (d,  $J=7.6$  Hz, 1H), 6.43 (s, 1H), 4.45 – 4.34 (m, 1H), 4.18 (t,  $J=7.7$  Hz, 1H), 4.06 – 3.98 (m, 1H), 3.94 (td,  $J=8.3, 3.6$  Hz, 2H), 3.86 (d,  $J=7.8$  Hz, 1H), 3.39 (t,  $J=7.6$  Hz, 1H), 3.16 – 3.07 (m, 1H), 2.91 – 2.84 (m, 1H), 2.53 (m, 1H), 2.35 (m, 2H), 1.40 – 1.28 (m, 13H), 1.28 – 1.18 (m, 37H).  $^{13}\text{C}$  NMR (150 MHz,  $\text{CDCl}_3$ )  $\delta$  163.6, 163.3, 163.2, 162.7, 162.7, 162.3, 160.9, 160.5, 151.7, 150.5, 149.6, 149.5, 147.7, 141.2, 139.0, 138.4, 137.9, 136.0, 135.1, 134.5, 133.8, 133.5, 132.7, 132.5, 132.3, 131.8, 131.3, 131.2, 130.5, 129.7, 129.1, 129.0, 128.9, 128.6, 128.2, 128.2, 127.4, 127.1, 127.0, 126.5, 126.2, 126.1, 125.8, 125.6, 124.7, 124.6, 124.4, 123.0, 122.5, 121.9, 121.6, 120.4, 118.7, 117.4, 117.3, 116.9, 116.3, 115.9, 115.8, 114.8, 114.2, 99.8, 99.3, 98.7, 97.9, 91.5, 80.8, 77.3, 77.1, 76.9, 75.6, 75.2, 72.3, 69.2, 29.8, 28.4, 28.3, 28.3, 28.0, 22.7, 19.6, 19.5, 19.5, 19.4, 19.4. MS(ESI) calcd  $\text{C}_{90}\text{H}_{79}\text{N}_{10}\text{O}_{10}$  for  $[\text{M}+\text{H}]^+$ : 1459.5975, found 1459.5944.

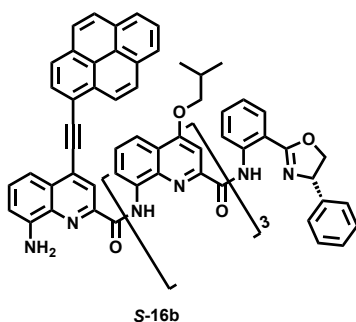

**Compound S-16b:** 140 mg **compound S-16b** was gained. Yield: 70%.  $^1\text{H}$  NMR (600 MHz,  $\text{CDCl}_3$ )  $\delta$  13.02 (s, 1H), 12.13 (s, 1H), 11.62 (s, 1H), 11.50 (s, 1H), 8.97 (d,  $J=6.9$  Hz, 1H), 8.93 (d,  $J=5.6$  Hz, 1H), 8.88 (d,  $J=9.2$  Hz, 1H), 8.51 (d,  $J=8.0$  Hz, 1H), 8.48 (d,  $J=8.0$  Hz, 1H), 8.42 (d,  $J=9.2$  Hz, 1H), 8.37 (d,  $J=8.0$  Hz, 1H), 8.31 (d,  $J=6.9$  Hz, 1H), 8.30 (s, 1H), 8.26 (d,  $J=6.9$  Hz, 1H), 8.23 (d,  $J=9.2$  Hz, 1H), 8.17 (d,  $J=8.0$  Hz, 1H), 8.14 (d,  $J=6.9$  Hz, 1H), 8.05 (s, 1H), 8.04 (s, 1H), 7.76 (t,  $J=8.0$  Hz, 1H), 7.2-7.69 (m, 4H), 7.44 (s, 1H), 7.36 (t,  $J=6.9$  Hz, 1H), 7.19-7.22 (m, 2H), 6.99 (s, 1H), 6.94 (s, 1H), 6.73 (t,  $J=5.8$  Hz, 1H), 6.68 (d,  $J=6.9$  Hz, 1H), 6.67 (d,  $J=8.0$  Hz, 1H), 6.42 (s, 1H), 6.41 (s, 1H), 4.15 (t,  $J=8.0$  Hz, 1H), 3.94-4.04 (m, 4H), 3.89 (t,  $J=6.9$  Hz, 1H), 3.52 (br, 2H), 3.38 (t,  $J=8.0$  Hz, 1H), 3.11 (t,  $J=5.8$  Hz, 1H), 3.00 (t,  $J=6.9$  Hz, 1H), 2.47-2.52 (m, 1H), 2.32-2.38 (m, 3H), 1.21-1.31 (m, 47H).  $^{13}\text{C}$  NMR (150 MHz,  $\text{CDCl}_3$ )  $\delta$  163.6, 163.2, 162.7, 161.0, 160.9, 149.5, 146.7, 144.1, 141.1, 138.8, 138.4, 137.9, 135.5, 134.8, 133.8, 132.6, 132.2, 131.8, 131.4, 131.2, 130.4, 129.8, 129.6, 129.0, 128.8, 128.2, 127.4, 127.1, 126.5, 126.1, 126.0, 125.8, 125.7, 124.7, 124.4, 122.9, 122.5, 122.0, 121.7, 120.4, 117.6, 117.2, 116.8, 116.8, 116.2, 116.1, 115.7, 114.2, 109.5, 99.7, 98.8, 98.4, 92.0, 77.3, 77.1, 76.9, 75.6, 75.5, 75.2, 72.3, 69.3, 28.4, 28.3, 19.6, 19.49, 19.4, 19.4. MS(ESI) calcd  $\text{C}_{85}\text{H}_{71}\text{N}_{10}\text{O}_8$  for  $[\text{M}+\text{H}]^+$ : 1359.5451, found 1359.5425.

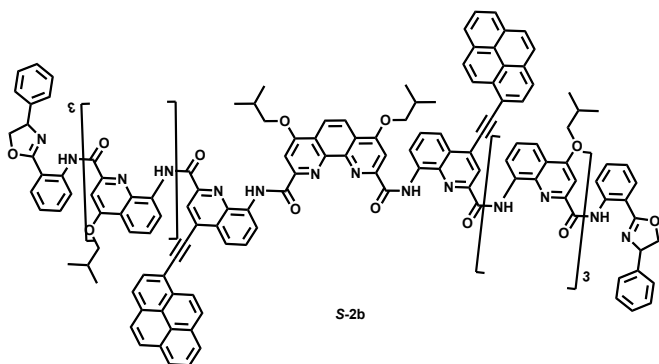

**Compound S-2b:** compounds **S-2b** as a yellow solid.  $^1\text{H NMR}$  (600 MHz,  $\text{CDCl}_3$ )  $\delta$  12.39 (s, 1H), 12.08 (s, 1H), 11.07 (s, 1H), 10.99 (s, 1H), 10.82 (s, 1H), 8.55 (d,  $J = 8.4$  Hz, 1H), 8.25 (d,  $J = 7.9$  Hz, 1H), 8.10 – 8.03 (m, 4H), 7.99 (d,  $J = 7.8$  Hz, 1H), 7.90 (t,  $J = 7.4$  Hz, 1H), 7.85 (d,  $J = 7.9$  Hz, 1H), 7.81 (t,  $J = 8.5$  Hz, 2H), 7.67 (d,  $J = 7.2$  Hz, 1H), 7.56 (s, 1H), 7.53 (d,  $J = 7.8$  Hz, 1H), 7.49 (d,  $J = 8.6$  Hz, 1H), 7.46 (d,  $J = 7.4$  Hz, 1H), 7.37 (t,  $J = 7.6$  Hz, 1H), 7.33 (d,  $J = 7.1$  Hz, 1H), 7.26 (s, 1H), 7.23 (d,  $J = 7.5$  Hz, 1H), 7.18 (t,  $J = 7.5$  Hz, 1H), 7.15 (s), 7.13 (d,  $J = 7.3$  Hz, 1H), 6.89 (t,  $J = 7.0$  Hz, 1H), 6.65 (s, 1H), 6.51 (t,  $J = 7.3$  Hz, 1H), 6.46 (s, 1H), 6.43 (t,  $J = 7.4$  Hz, 2H), 6.32 (s, 1H), 6.14 (s, 1H), 6.11 (s, 1H), 6.10 (s, 1H), 3.90 (m, 6H), 3.80 (t,  $J = 7.4$  Hz, 1H), 3.69 (d,  $J = 6.6$  Hz, 1H), 3.66 (d,  $J = 6.2$  Hz, 1H), 3.10 – 3.07 (m, 1H), 2.71 (t,  $J = 8.8$  Hz, 1H), 2.60 (dd,  $J = 9.6, 6.4$  Hz, 1H), 2.39 (m, 3H), 2.18 (m, 1H), 1.34 – 1.20 (m, 33H), 1.15 (d,  $J = 6.8$  Hz, 3H), 1.11 (d,  $J = 6.7$  Hz, 3H), 0.92 – 0.82 (m, 3H).  $^{13}\text{C NMR}$  (150 MHz,  $\text{CDCl}_3$ )  $\delta$  162.8, 162.6, 162.2, 161.9, 161.6, 160.4, 159.9, 159.8, 159.2, 148.8, 148.7, 147.6, 146.2, 142.7, 140.9, 138.6, 138.0, 137.8, 136.8, 136.0, 133.8, 133.2, 133.0, 131.8, 131.2, 130.8, 130.7, 130.6, 129.7, 129.2, 128.7, 128.1, 127.9, 127.8, 127.3, 126.8, 126.7, 126.6, 125.9, 125.5, 125.2, 123.8, 123.6, 122.3, 121.7, 121.5, 121.2, 120.9, 120.3, 119.9, 119.2, 117.3, 117.0, 116.8, 116.6, 116.1, 115.3, 113.7, 99.8, 98.8, 98.5, 98.1, 97.8, 91.6, 77.3, 77.1, 76.9, 75.4, 75.1, 74.8, 71.9, 68.8, 29.8, 29.4, 28.4, 28.3, 28.22, 28.1, 19.8, 19.7, 19.6, 19.4, 19.4, 19.4. MS(ESI) calcd  $\text{C}_{192}\text{H}_{160}\text{N}_{22}\text{O}_{20}\text{Na}$  for  $[\text{M}+\text{Na}]^+$ : 3118.2139, found 3118.2124.

## Chiroptical Properties:

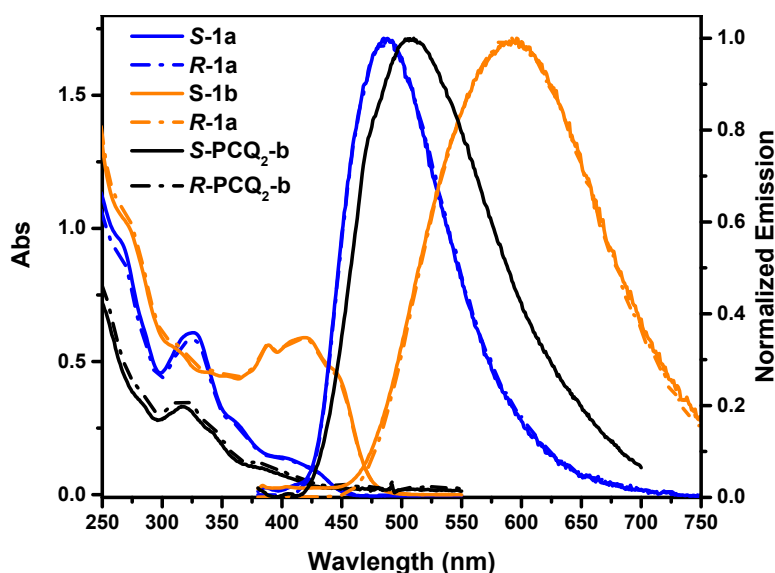

Figure S1 Uv-vis absorption and normalized emission spectra of *S/R*-1a/1b and *S/R*-PCQ<sub>2</sub>-b ( $1.0 \times 10^{-5}$  M, DCM at 298 K,  $\lambda_{\text{exc}}=360$  nm).

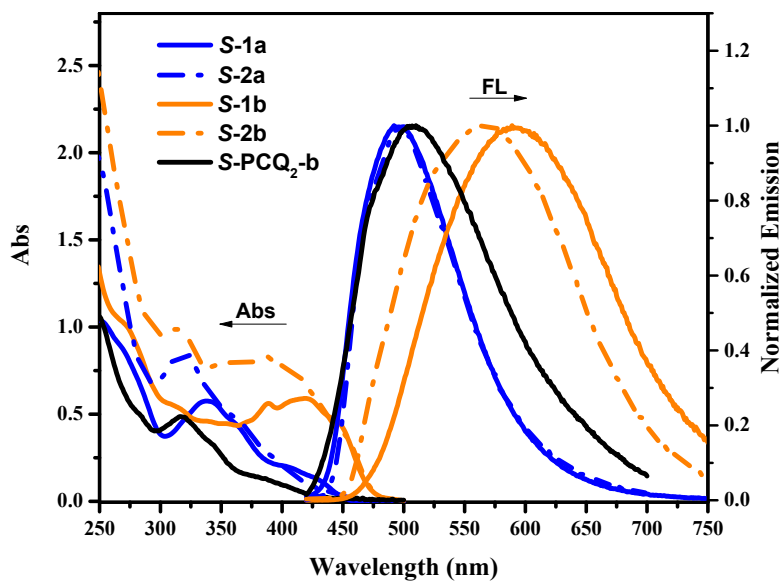

Figure S2 Uv-vis absorption and normalized emission spectra of *S-1a/1b* and *S-2a/2b* ( $1.0 \times 10^{-5}$  M, DCM at 298 K,  $\lambda_{\text{ex}}=360$  nm).

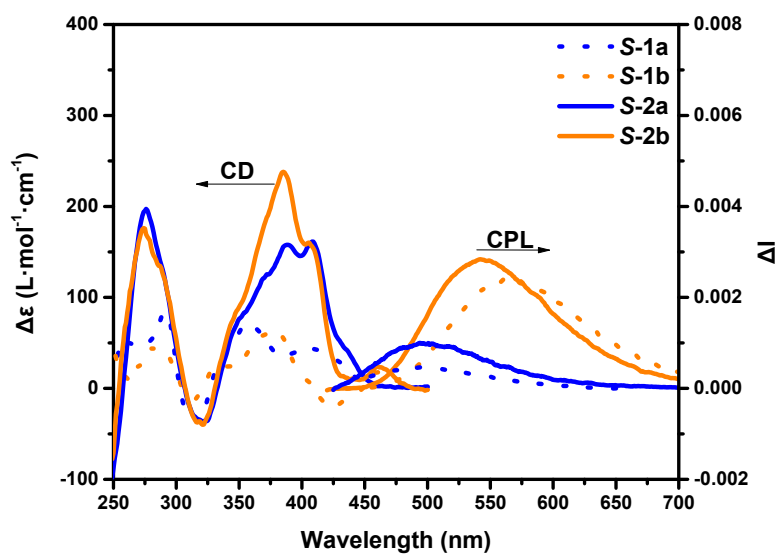

Figure S3 CD and CPL spectra of *S-1a/1b* and *S-2a/2b* ( $1.0 \times 10^{-5}$  M, DCM at 298 K).

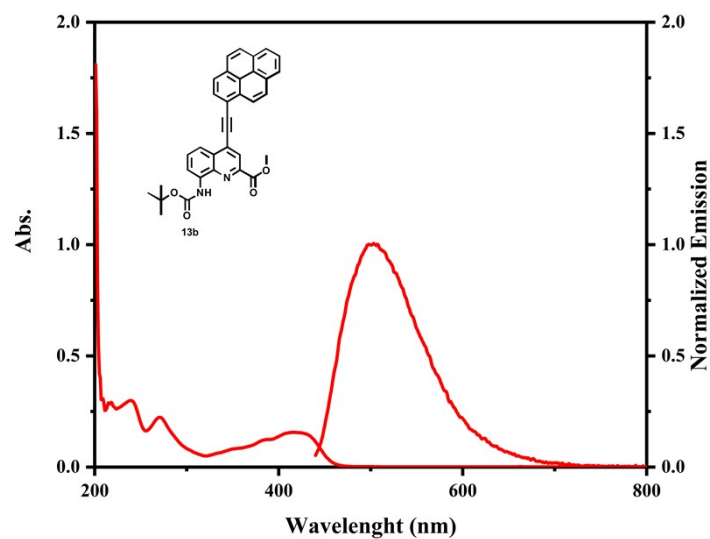

Figure S4 Uv-vis absorption and normalized emission spectra of **13b** ( $1.0 \times 10^{-5}$  M, DCM at 298 K,  $\lambda_{\text{ex}}=430$  nm,  $\lambda_{\text{em}}=500$ nm). The quantum yield was determined to be 0.2 by using a calibrated integrating sphere.

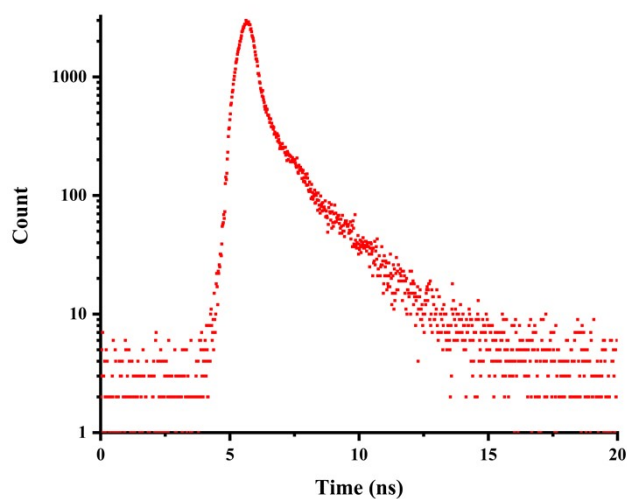

Figure S5 Emission lifetime of **13b** ( $\tau=1.44$  ns,  $1.0 \times 10^{-5}$  M, DCM at 298 K).

**Table S1** Optical properties of *S/R*-**1a**~**1b**, **S-2a** and **S-2b**.

| Compd.      | $\lambda_{\text{Abs}}/\text{nm}$ | $\epsilon_{\text{m}}(\times 10^4)$ | $\epsilon_{360 \text{ nm}}(\times 10^4)$ | $\Phi^a/\%$ | $g_{\text{lum}}/10^{-3}(\text{nm})$ | $B^b/\text{M}^{-1} \cdot \text{cm}^{-1}$ |
|-------------|----------------------------------|------------------------------------|------------------------------------------|-------------|-------------------------------------|------------------------------------------|
| <b>S-1a</b> | 327                              | 5.8                                | 2.5                                      | 56.1        | 1.4 (490)                           | 9.9                                      |

|                            |     |     |     |      |            |       |
|----------------------------|-----|-----|-----|------|------------|-------|
| <b>R-1a</b>                | 327 | 6.0 | 2.6 | 56.8 | -1.2 (490) | 9.3   |
| <b>S-1b</b>                | 418 | 5.9 | 4.4 | 45.1 | 5.0 (550)  | 49.1  |
| <b>R-1b</b>                | 418 | 5.9 | 4.5 | 44.2 | -4.8(550)  | 47.4  |
| <b>S-PCQ<sub>2</sub>-b</b> | 316 | 3.2 | 2.0 | 5.8  | 3.6 (480)  | 2.0   |
| <b>R-PCQ<sub>2</sub>-b</b> | 316 | 2.9 | 1.9 | 5.4  | -3.1(480)  | 1.7   |
| <b>S-2a</b>                | 320 | 8.6 | 4.9 | 36.0 | 3.3 (485)  | 29.2  |
| <b>S-2b</b>                | 386 | 9.9 | 8.0 | 44.4 | 6.2 (520)  | 109.8 |

<sup>a</sup>  $\Phi$  is measured using a calibrated integrating sphere, excited at 360 nm. <sup>b</sup>  $B_{CPL}$  refers to the resulting brightness which is calculated by  $B_{CPL} = \epsilon_{ex} \cdot \Phi \cdot \frac{|g_{lum}|}{2}$ , while  $\epsilon_{\lambda}$  is the extinction coefficient at the excitation wavelength. <sup>2</sup>

## NMR & MS Spectra:

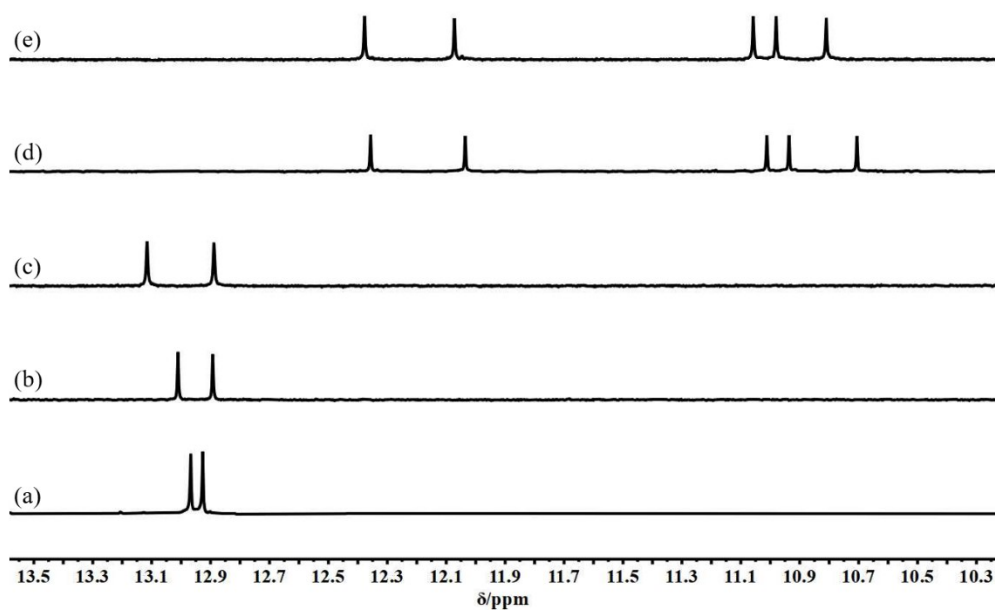

Figure S6 Parts of <sup>1</sup>H NMR of (a) **S-PCQ<sub>2</sub>-b**, (b) **S-1a**, (c) **S-1b**, (d) **S-2a** and (e) **S-2b** in CDCl<sub>3</sub> at 298 K.

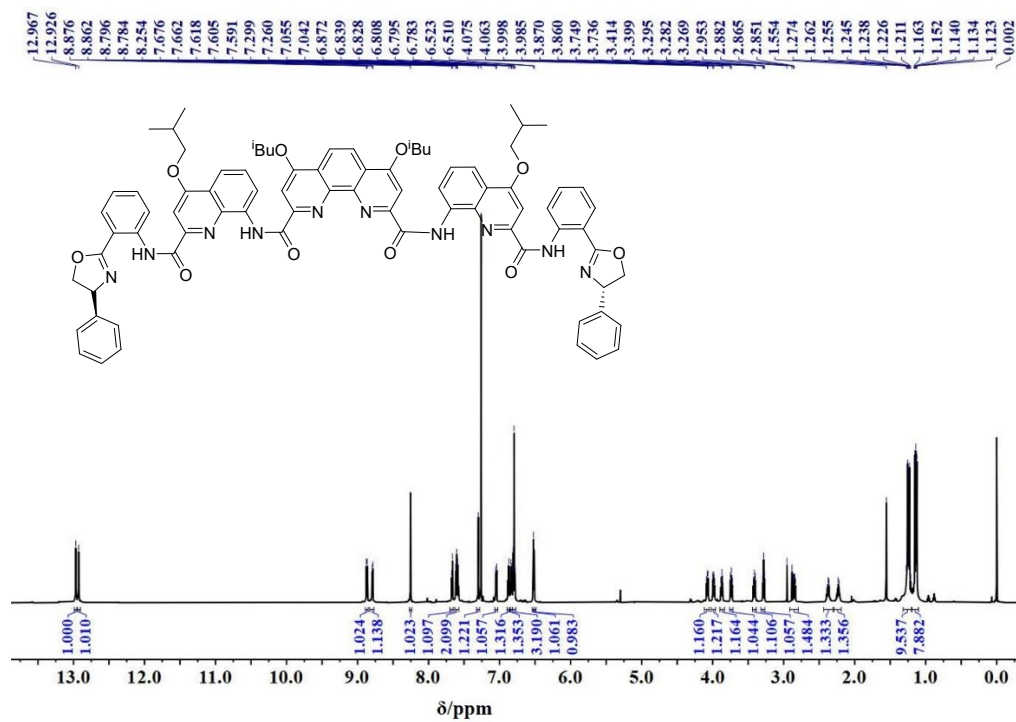

Figure S7 <sup>1</sup>H NMR of *S*-PCQ<sub>2</sub>-b(CDCl<sub>3</sub>)

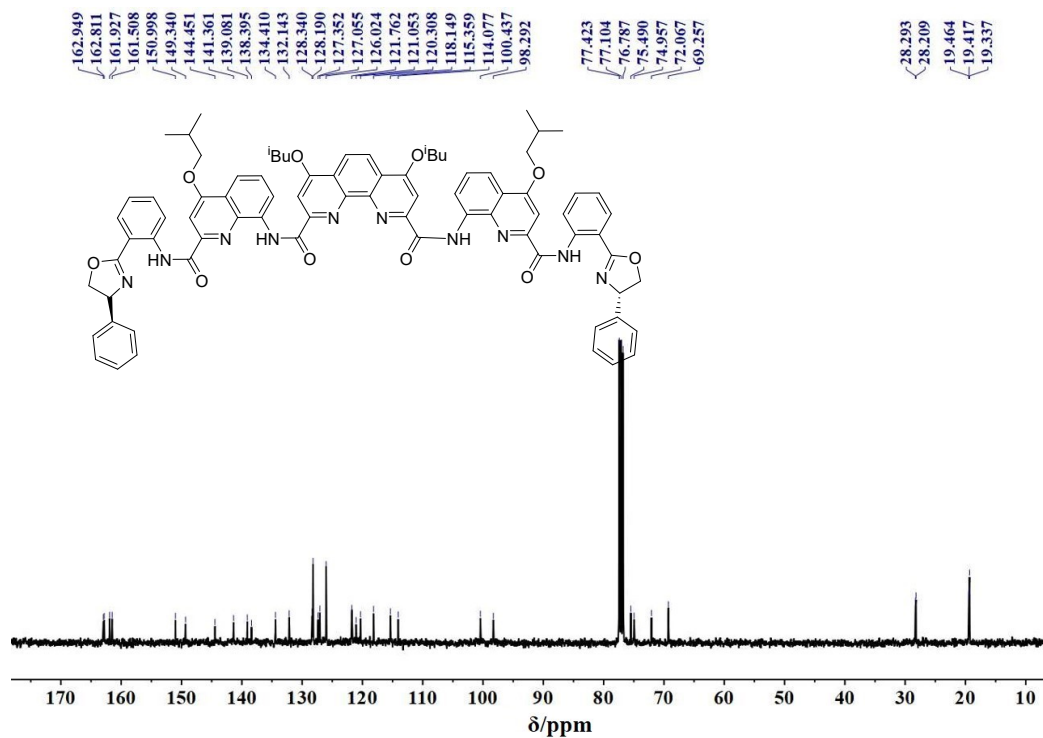

Figure S8 <sup>13</sup>C NMR of *S*-PCQ<sub>2</sub>-b(CDCl<sub>3</sub>)

116S #23 RT: 0.39 AV: 1 NL: 1.03E3  
 T: FTMS (1,1) + p ESI Full ms [200.00-2000.00]

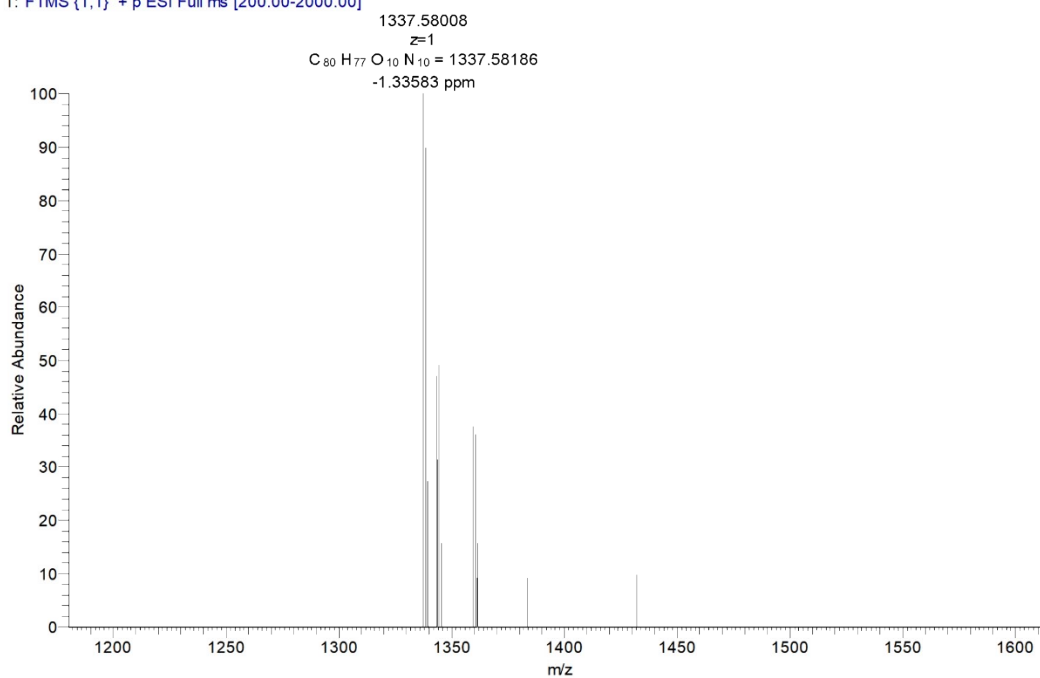

Figure S9 ESI-MS of **S-PCQ<sub>2</sub>-b**(CDCl<sub>3</sub>)

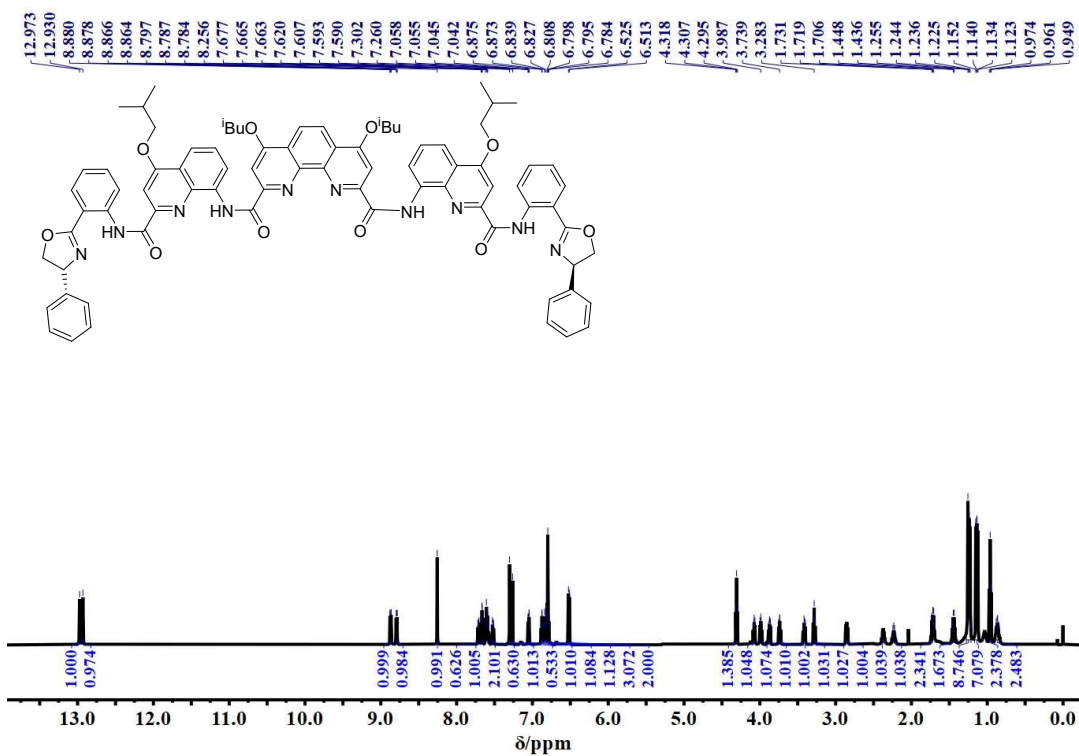

Figure S10 <sup>1</sup>H NMR of **R-PCQ<sub>2</sub>-b**(CDCl<sub>3</sub>)



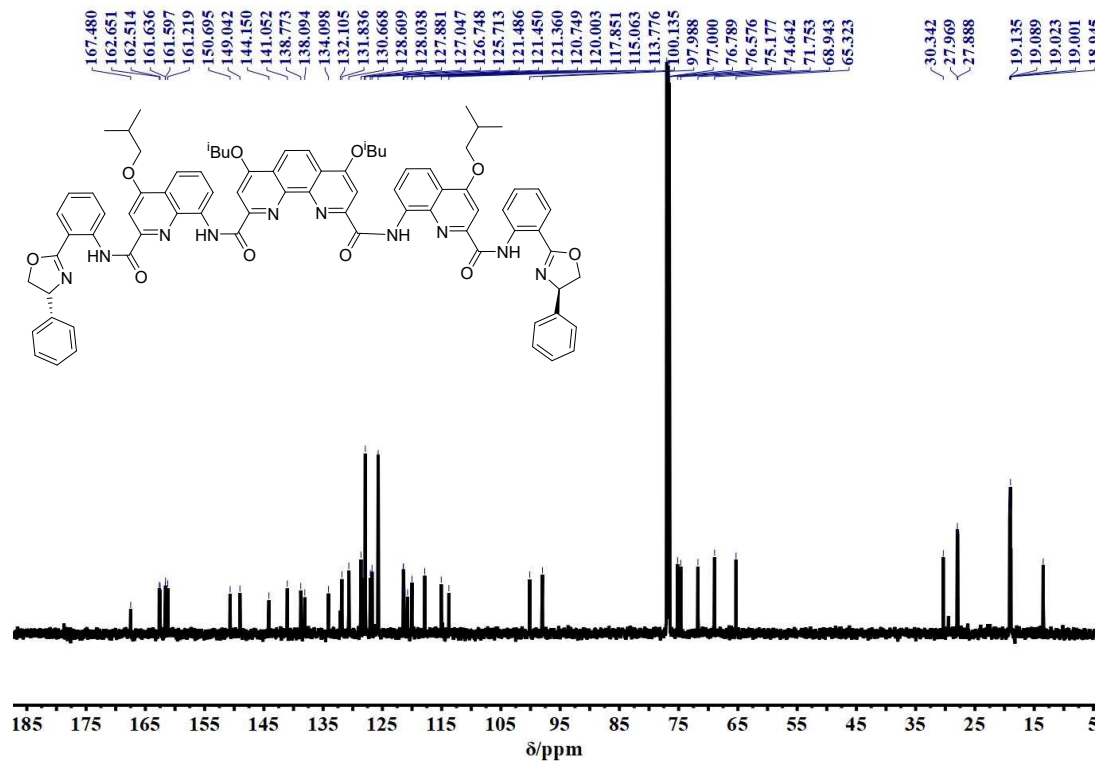

Figure S11 <sup>13</sup>C NMR of *R*-PCQ<sub>2</sub>-b(CDCl<sub>3</sub>)

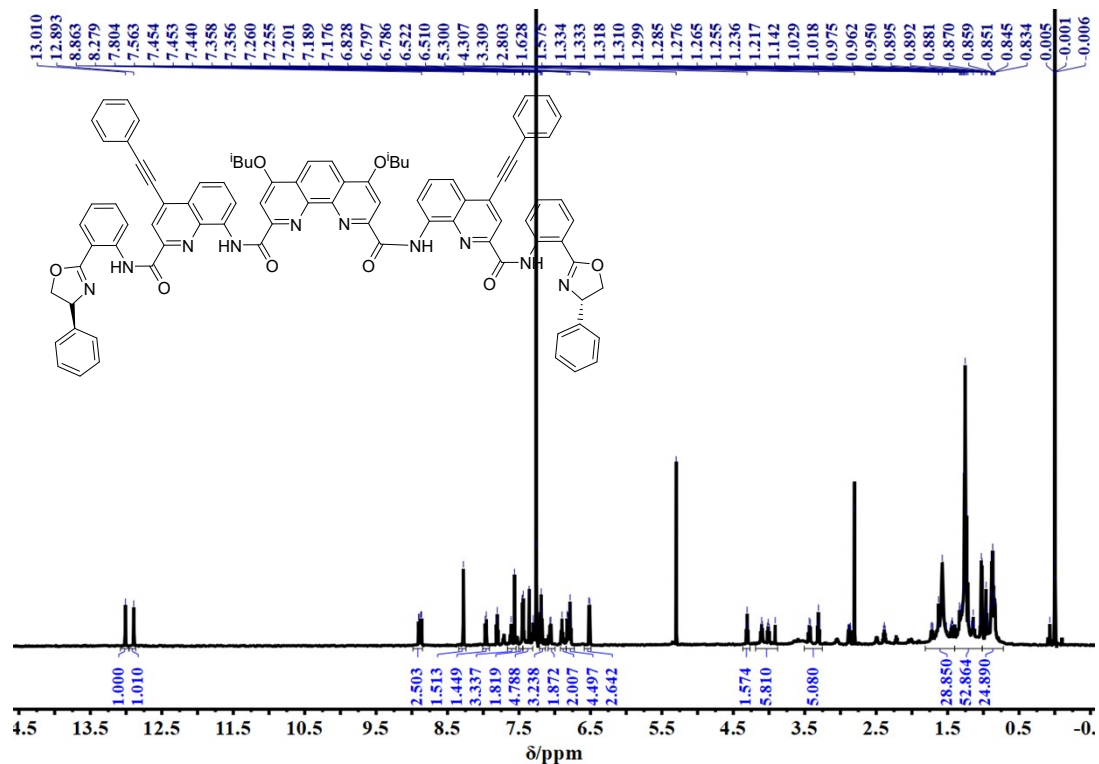

Figure S12 <sup>1</sup>H NMR of *S*-1a(CDCl<sub>3</sub>)

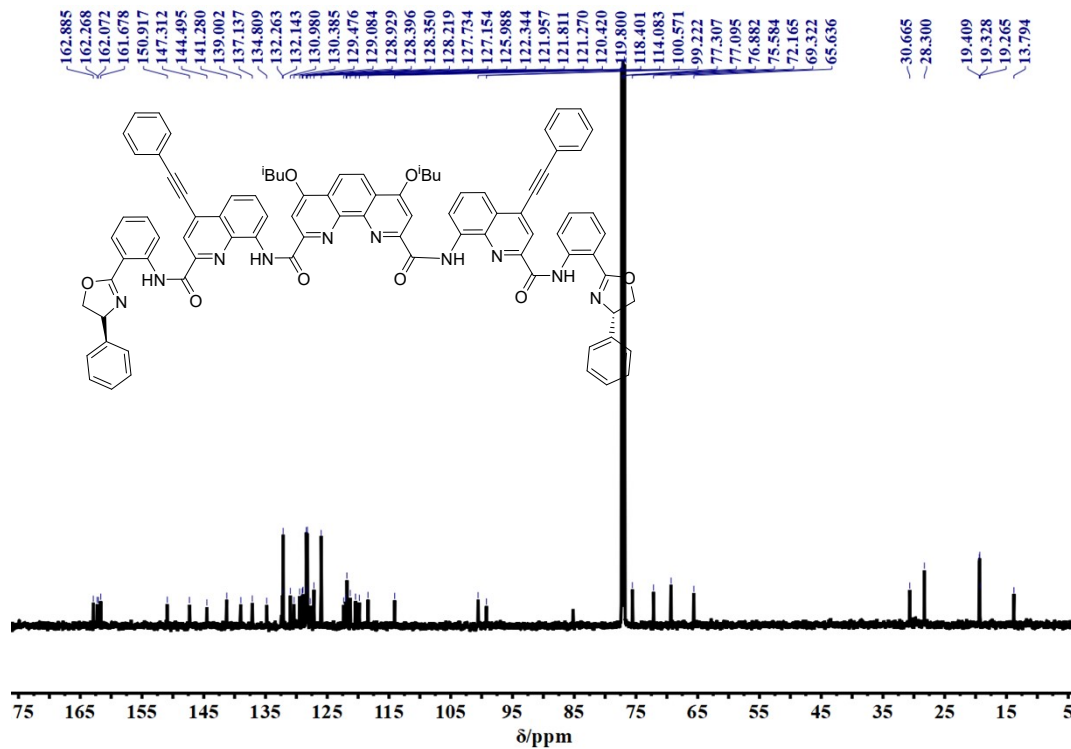

Figure S13 <sup>13</sup>C NMR of **S-1a**(CDCl<sub>3</sub>)

COD-94S #23 RT: 0.36 AV: 1 NL: 2.76E5  
T: FTMS (1,1) + p ESI Full ms [200.00-2000.00]

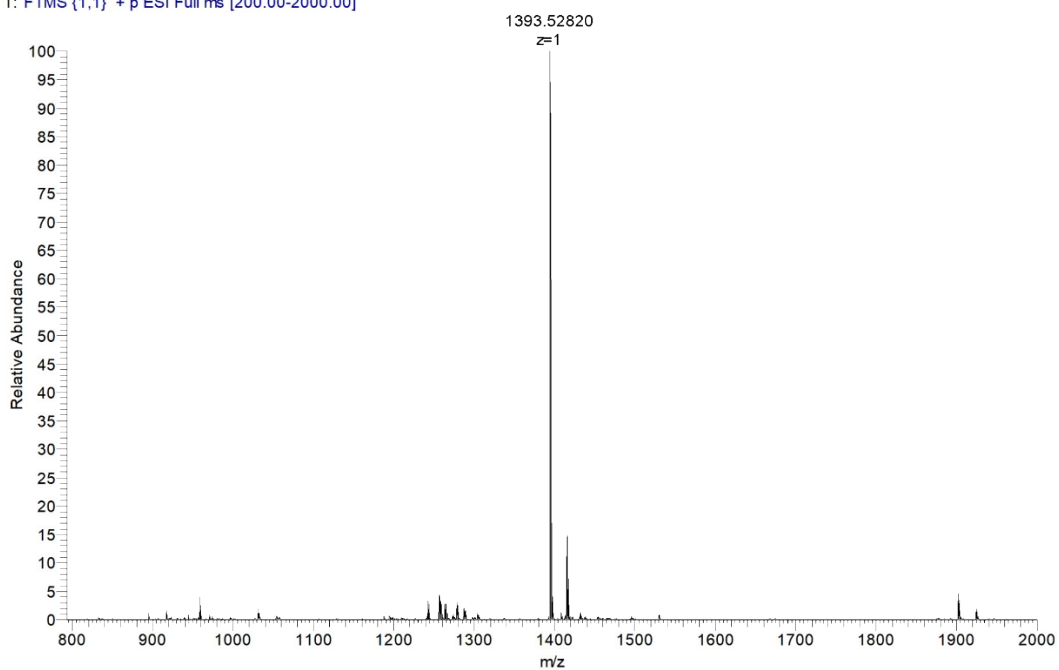

Figure S14 ESI-MS of **S-1a**

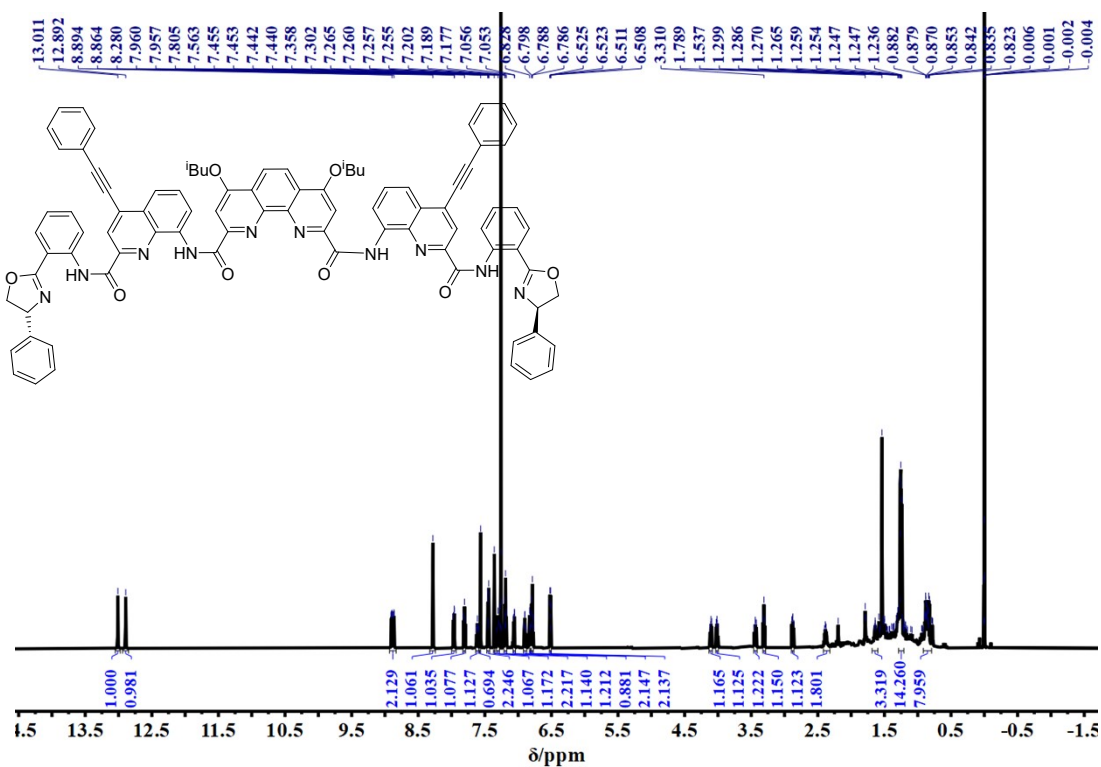

Figure S15  $^1\text{H NMR}$  of **R-1a**(CDCl<sub>3</sub>)

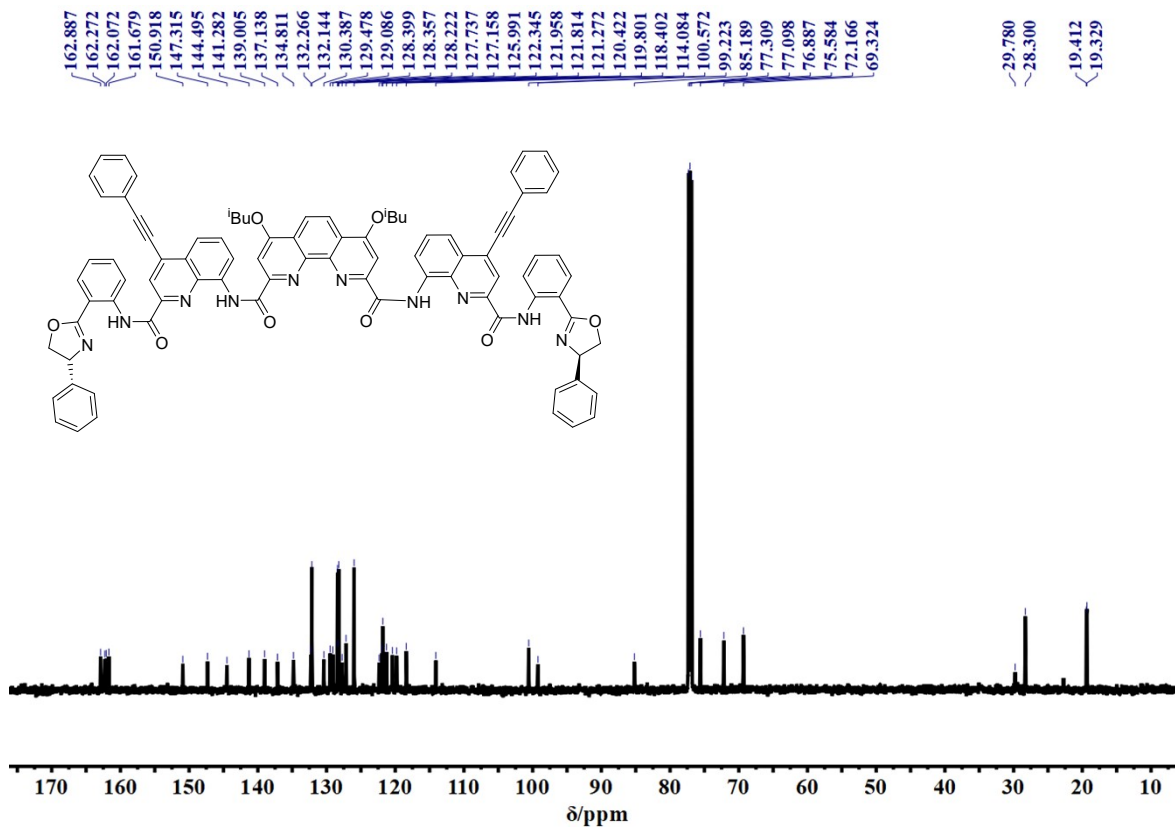

Figure S16  $^{13}\text{C NMR}$  of **R-1a**(CDCl<sub>3</sub>)

COD-94R #31 RT: 0.46 AV: 1 NL: 1.76E5  
T: FTMS {1,1} + p ESI Full ms [200.00-2000.00]

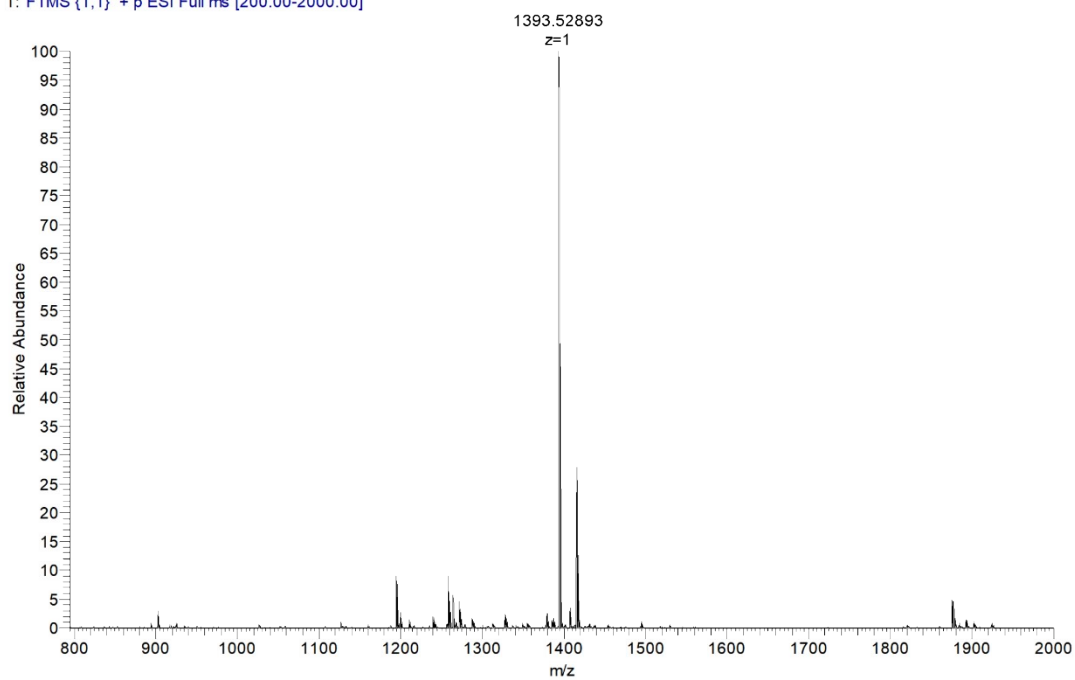

Figure S17 ESI-MS of **R-1a**

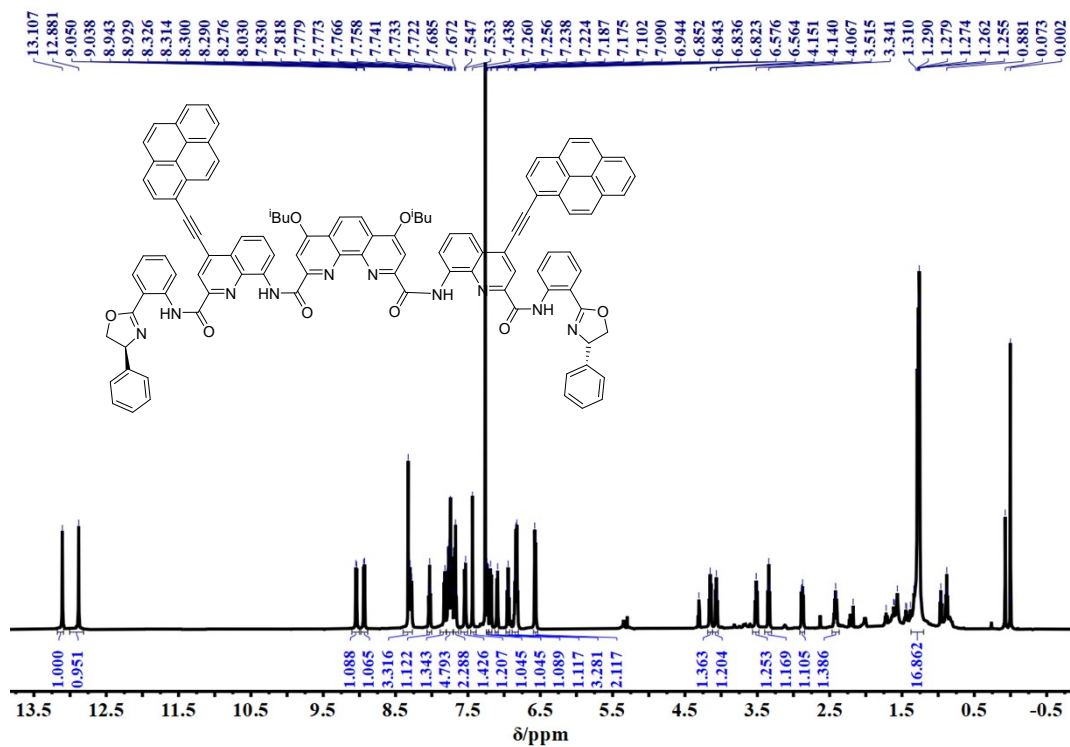

Figure S18 <sup>1</sup>H NMR of **S-1b** (CDCl<sub>3</sub>)

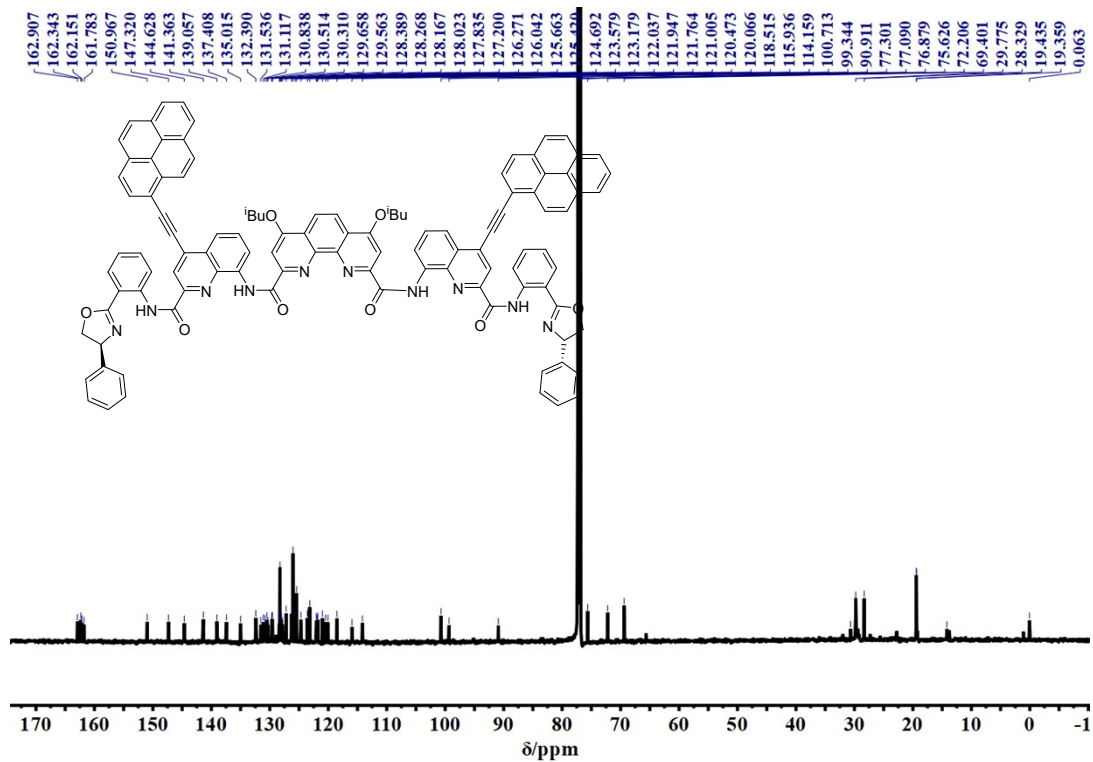

Figure S19 <sup>13</sup>C NMR of **S-1b** (CDCl<sub>3</sub>)

COD-98S #53 RT: 0.86 AV: 1 NL: 2.01E4  
T: FTMS (1,1) + p ESI Full ms [200.00-2000.00]

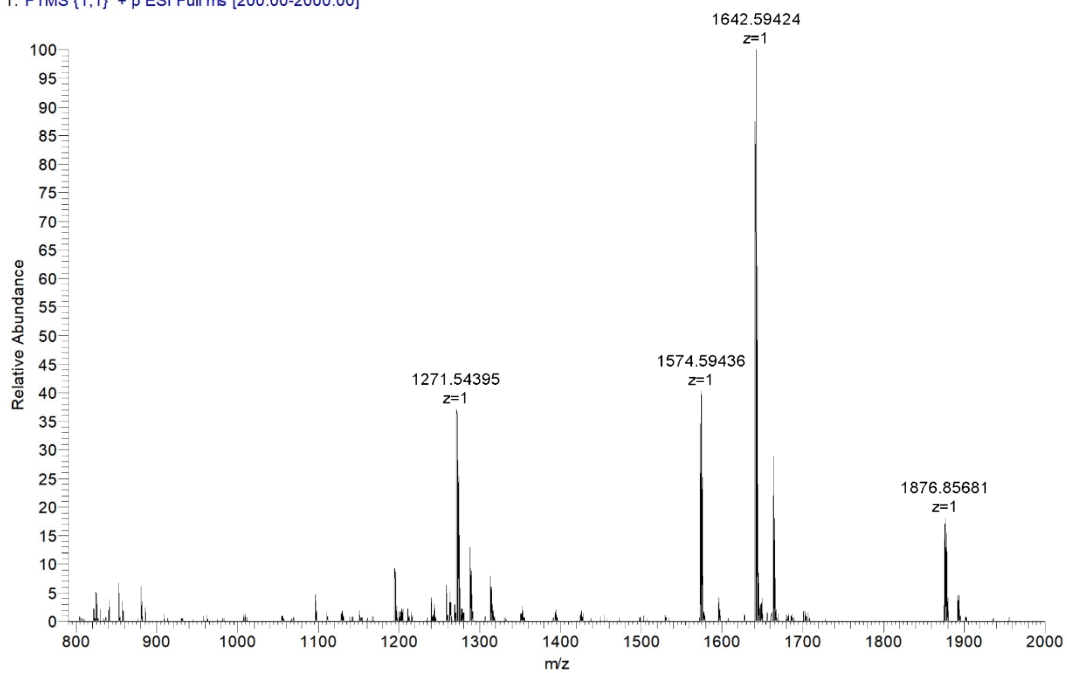

Figure S20 ESI-MS of **S-1b**

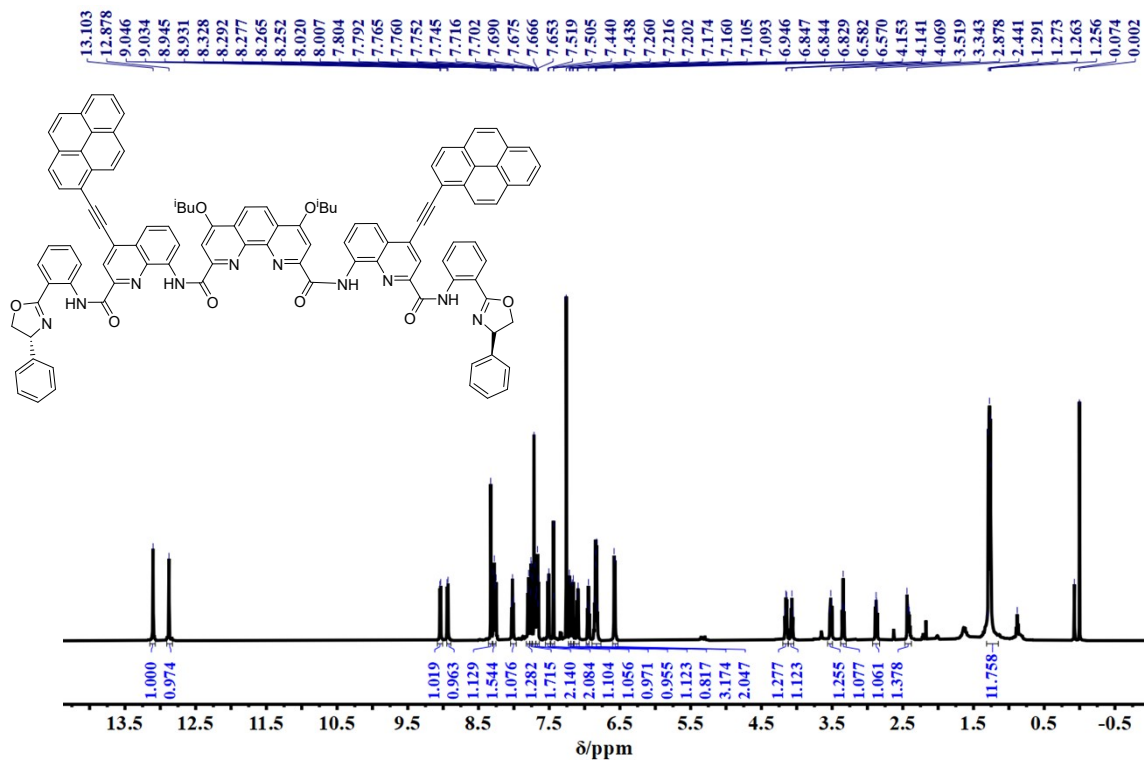

Figure S21 <sup>1</sup>H NMR of *R-1b* (CDCl<sub>3</sub>)

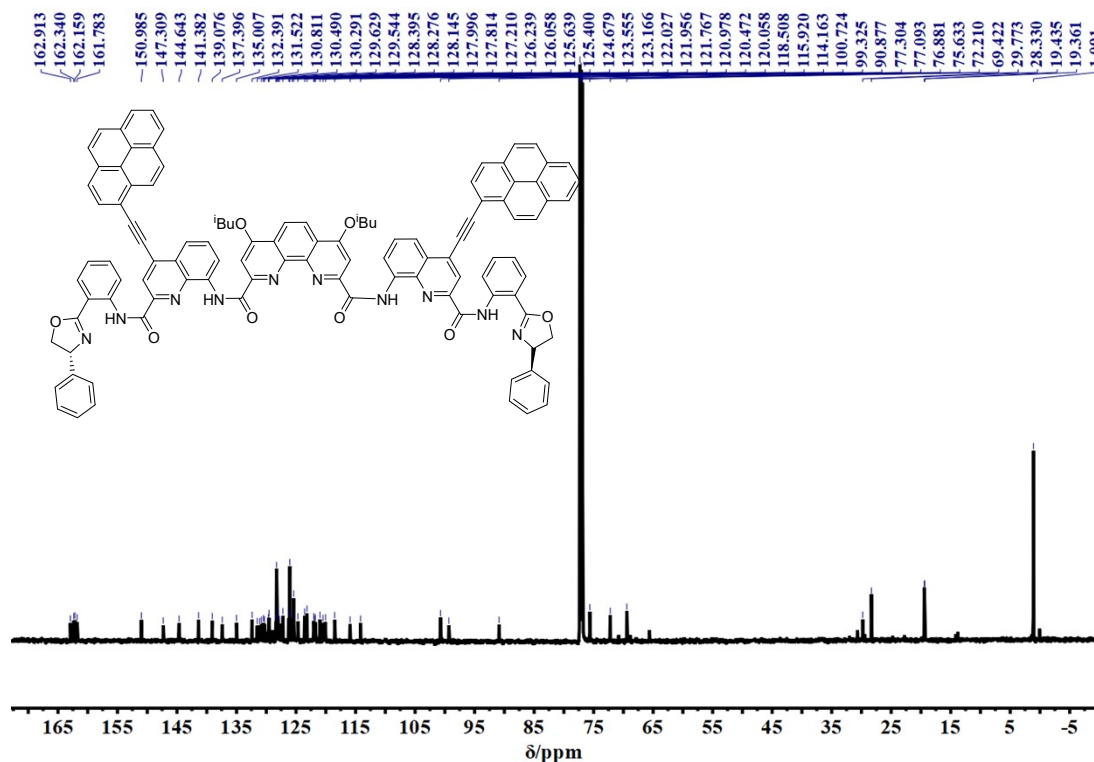

Figure S22 <sup>13</sup>C NMR of *R-1b* (CDCl<sub>3</sub>)

COD-98R #55 RT: 0.86 AV: 1 NL: 4.84E4  
T: FTMS (1,1) + p ESI Full ms [200.00-2000.00]

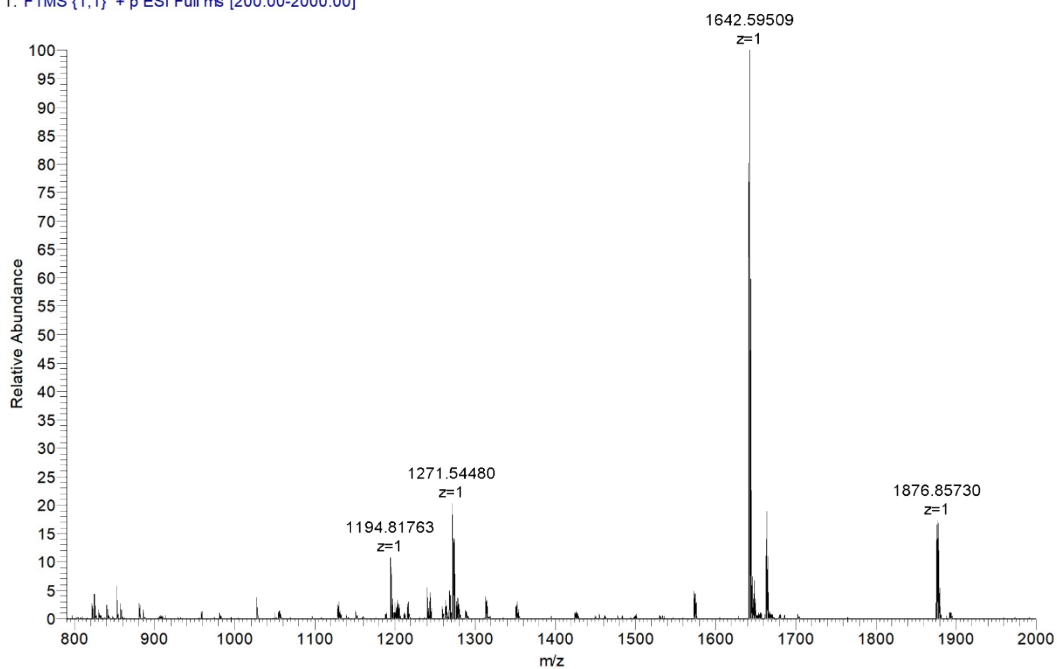

Figure S23 ESI-MS of **R-1b**

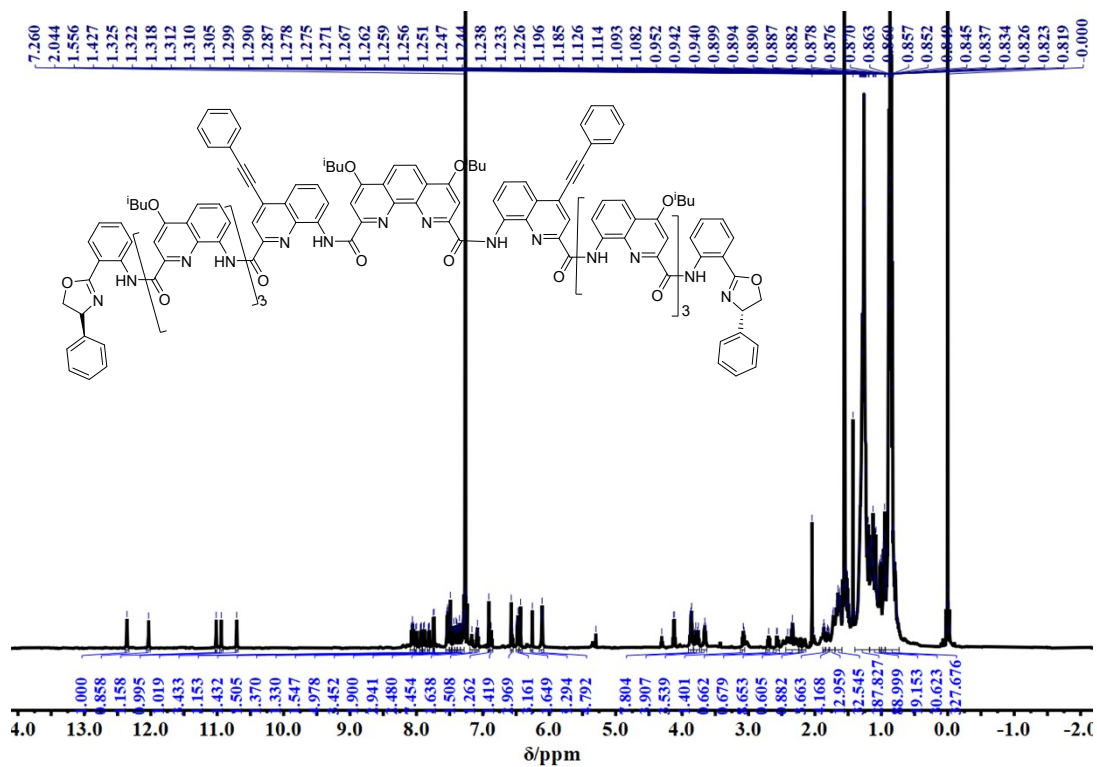

Figure S24 <sup>1</sup>H NMR of **S-2a** (CDCl<sub>3</sub>)

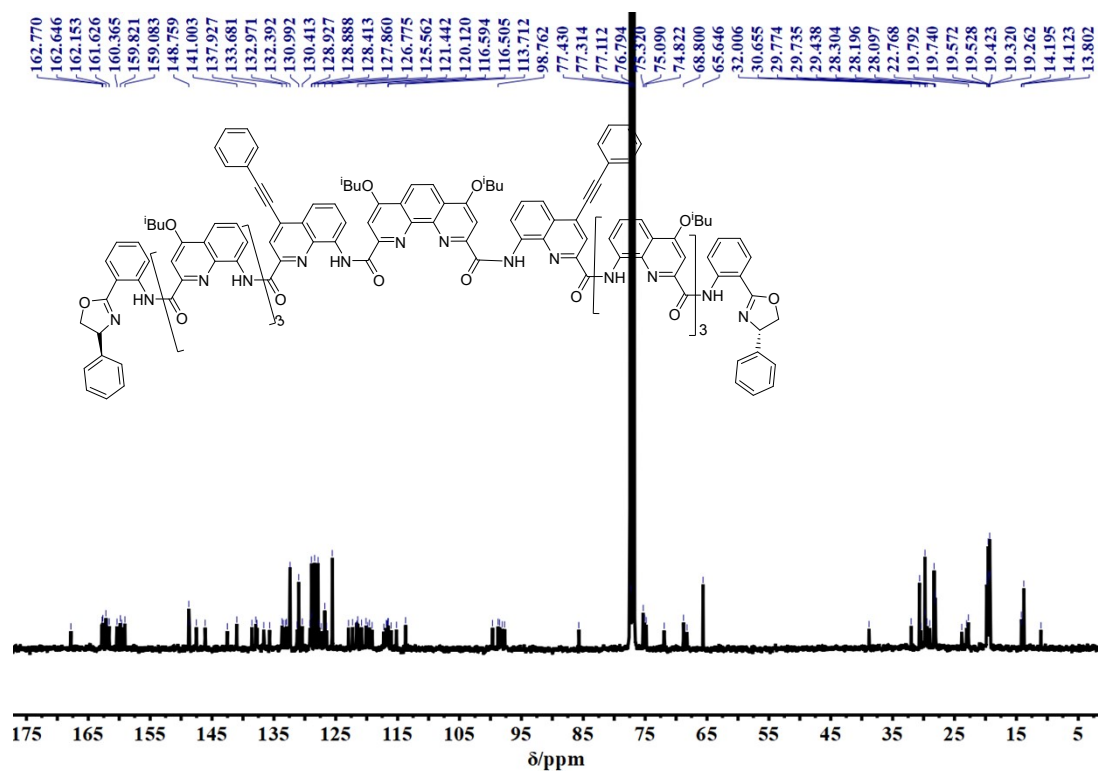

Figure S25  $^{13}\text{C}$  NMR of **S-2a** ( $\text{CDCl}_3$ )

COD-117S #7 RT: 0.13 AV: 1 NL: 2.63E4  
 T: FTMS (1,1) + p ESI Full ms [400.00-3000.00]  
 1424.08594

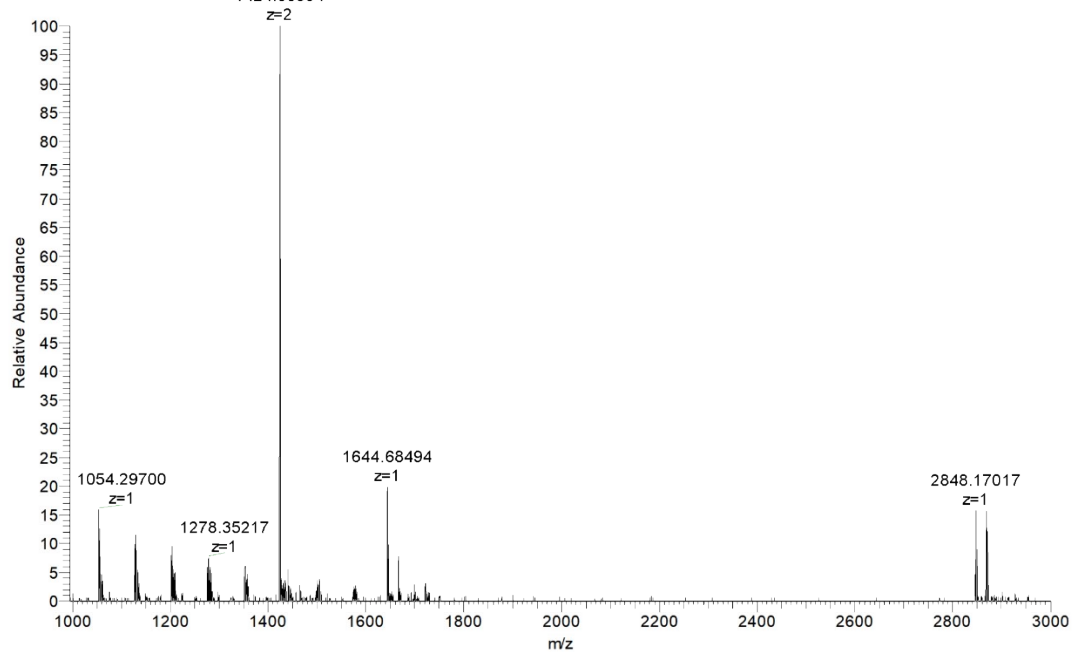

Figure S26 ESI-MS of **S-2a**



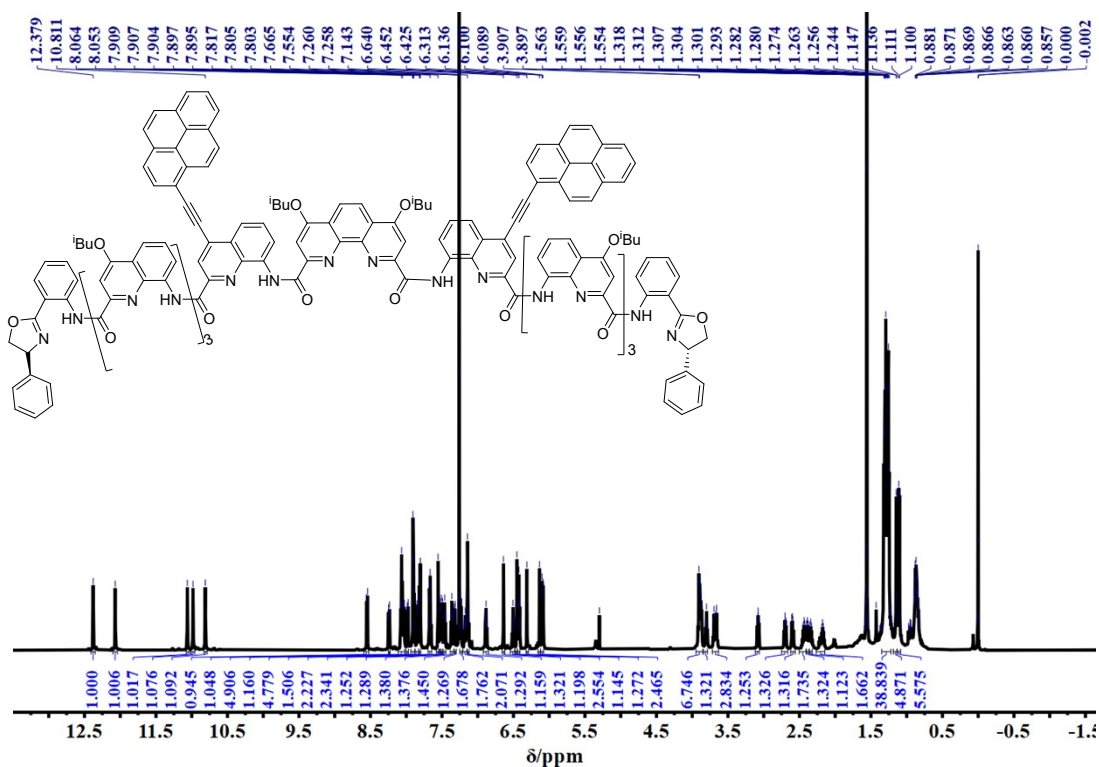

Figure S27  $^1\text{H}$  NMR of *S-2b*( $\text{CDCl}_3$ )

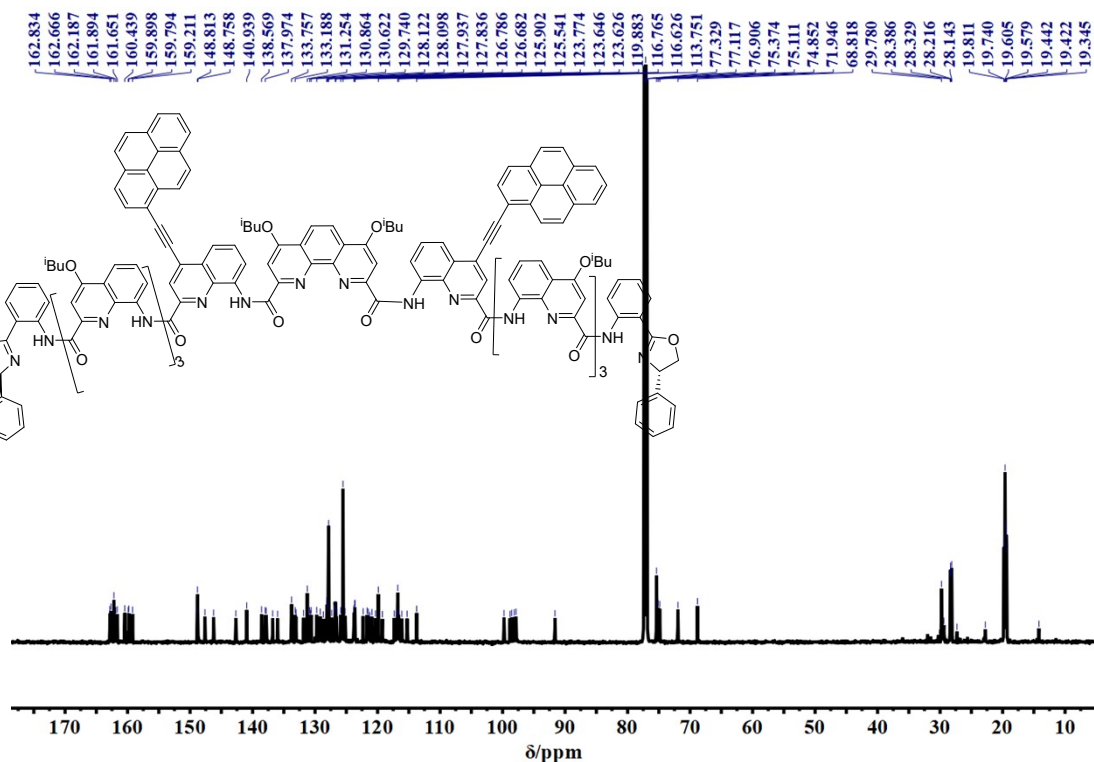

Figure S28  $^{13}\text{C}$  NMR of *S-2b*( $\text{CDCl}_3$ )

110S #15 RT: 0.32 AV: 1 NL: 1.23E3  
T: FTMS (1,1) + p ESI Full ms [500.00-4000.00]

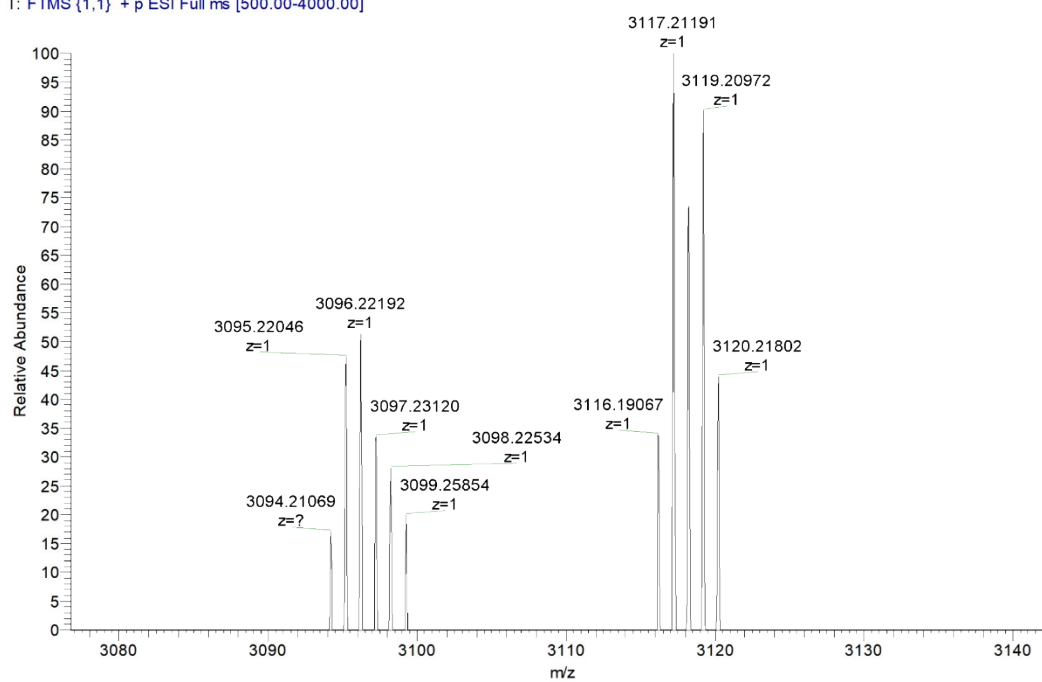

Figure S29 ESI-MS of **S-2b**

---

## Reference:

- 1 (a)D. Zheng, C. Yu, L. Zheng, Y. Zhan and H. Jiang, *Chin. Chem. Lett.*, 2020, **31**, 673-676; (b)D. Zheng, L. Zheng, C. Y. Yu, Y. L. Zhan, Y. Wang and H. Jiang, *Org. Lett.*, 2019, **21**, 2555-2559.
- 2 (a)T. Mori, *Circularly Polarized Luminescence of Isolated Small Organic Molecules*, Springer Nature Singapore Pte Ltd., Singapore, 2020; (b) L. Arrico, L.Di Bari, and F. Zinna, *Chem. Eur. J.* 2021, 27, 2920 – 2934.
